# Supplementary material for: Isolation of lingzhifuran A and lingzhilactones D–F from Ganoderma lucidum as specific Smad3 phosphorylation inhibitors and total synthesis of lingzhifuran A
Source: Royal Society of Chemistry journal article supplement (doi:10.1039/c6ra17900b), 2016-01-01
Supplement: c6ra17900b1.pdf [file c6ra17900b1.pdf]

## Isolation of lingzhifuran A and lingzhilactones D-F from *Ganoderma lucidum* as specific Smad3 phosphorylation inhibitors and total synthesis of lingzhifuran A

Wei-Yi Ding,<sup>ab1</sup> Jun Ai,<sup>c1</sup> Xin-Long Wang,<sup>a1</sup> Fayang G. Qiu,<sup>d</sup> Qing Lv,<sup>a</sup> Ping Fang,<sup>a</sup> Fan-Fan Hou,<sup>\*c</sup> Yong-Ming Yan<sup>\*a</sup> and Yong-Xian Cheng<sup>\*a</sup>

---

<sup>a</sup>State Key Laboratory of Phytochemistry and Plant Resources in West China, Kunming Institute of Botany, Chinese Academy of Sciences, Kunming 650204, People's Republic of China

<sup>b</sup>University of Chinese Academy of Sciences, Yuquan Road 19, Beijing 100049, People's Republic of China

<sup>c</sup>State Key Laboratory of Organ Failure Research, National Clinical Research Center for Kidney Disease, and Division of Nephrology, Nanfang Hospital, Southern Medical University, Guangzhou, 510515, People's Republic of China

<sup>d</sup>Laboratory of Molecular Engineering and Laboratory of Natural Product Synthesis, Guangzhou Institutes of Biomedicine and Health, Chinese Academy of Sciences, Guangzhou, 510530, People's Republic of China

\* Corresponding authors. Tel./fax: +86-871-65223048; e-mail: yxcheng@mail.kib.ac.cn (Y.-X.C.); yanym@mail.kib.ac.cn (Y.-M.Y.); fffhouguangzhou@163.com (F.-F.H.)

# Contents of Supplementary Information

## I. The NMR, HREIMS, and UV spectra of natural lingzhifuran A (1).

- Figure S1. The  $^1\text{H}$  NMR spectrum (acetone- $d_6$ , 400 MHz) of **1**.
- Figure S2. The  $^{13}\text{C}$  NMR spectrum (acetone- $d_6$ , 200 MHz) of **1**.
- Figure S3. The DEPT spectra (acetone- $d_6$ , 200 MHz) of **1**.
- Figure S4. The  $^1\text{H}$ - $^1\text{H}$  COSY spectrum (acetone- $d_6$ , 800 MHz) of **1**.
- Figure S5. The HMQC spectrum (acetone- $d_6$ , 800 MHz) of **1**.
- Figure S6. The HMBC spectrum (acetone- $d_6$ , 800 MHz) of **1**.
- Figure S7. The ROESY spectrum (acetone- $d_6$ , 800 MHz) of **1**.
- Figure S8. The enlarged ROESY spectrum (acetone- $d_6$ , 800 MHz) of **1**.
- Figure S9. The HREI (positive) spectrum of **1**.
- Figure S10. The UV spectrum (MeOH) of **1**.

## II. The NMR, HRESIMS and CD spectra of lingzhilactone D (2).

- Figure S11. The  $^1\text{H}$  NMR spectrum (acetone- $d_6$ , 600 MHz) of **2**.
- Figure S12. The DEPT spectra (acetone- $d_6$ , 150 MHz) of **2**.
- Figure S13. The  $^1\text{H}$ - $^1\text{H}$  COSY spectrum (acetone- $d_6$ , 600 MHz) of **2**.
- Figure S14. The HSQC spectrum (acetone- $d_6$ , 600 MHz) of **2**.
- Figure S15. The HMBC spectrum (acetone- $d_6$ , 600 MHz) of **2**.
- Figure S16. The ROESY spectrum (acetone- $d_6$ , 600 MHz) of **2**.
- Figure S17. The HRESIMS (negative) spectrum of **2**.
- Figure S18. The experiment CD spectrum (+)-(2).
- Figure S19. The experiment CD spectrum (-)-(2).

## III. The NMR, HRESIMS and CD spectra of lingzhilactone E (3).

- Figure S20. The  $^1\text{H}$  NMR spectrum (acetone- $d_6$ , 600 MHz) of **3**.
- Figure S21. The DEPT spectra (acetone- $d_6$ , 150 MHz) of **3**.
- Figure S22. The  $^1\text{H}$ - $^1\text{H}$  COSY spectrum (acetone- $d_6$ , 600 MHz) of **3**.
- Figure S23. The HSQC spectrum (acetone- $d_6$ , 600 MHz) of **3**.
- Figure S24. The HMBC spectrum (acetone- $d_6$ , 600 MHz) of **3**.
- Figure S25. The ROESY spectrum (acetone- $d_6$ , 600 MHz) of **3**.
- Figure S26. The HRESIMS (negative) spectrum of **3**.

## IV. The NMR, HRESIMS and CD spectra of lingzhilactone F (4).

- Figure S27. The  $^1\text{H}$  NMR spectrum (acetone- $d_6$ , 600 MHz) of **4**.
- Figure S28. The DEPT spectra (acetone- $d_6$ , 150 MHz) of **4**.
- Figure S29. The  $^1\text{H}$ - $^1\text{H}$  COSY spectrum (acetone- $d_6$ , 600 MHz) of **4**.
- Figure S30. The HSQC spectrum (acetone- $d_6$ , 600 MHz) of **4**.
- Figure S31. The HMBC spectrum (acetone- $d_6$ , 600 MHz) of **4**.
- Figure S32. The ROESY spectrum (acetone- $d_6$ , 600 MHz) of **4**.
- Figure S33. The HRESIMS (negative) spectrum of **4**.

## V. The NMR spectra of synthetic intermediates 5-10.

Figure S34. The  $^1\text{H}$  NMR spectrum ( $\text{CDCl}_3$ , 400 MHz) of synthetic intermediate **6**.  
Figure S35. The  $^{13}\text{C}$  NMR spectrum ( $\text{CDCl}_3$ , 100 MHz) of synthetic intermediate **6**.  
Figure S36. The  $^1\text{H}$  NMR spectrum ( $\text{DMSO}-d_6$ , 400 MHz) of intermediate **7**.  
Figure S37. The  $^{13}\text{C}$  NMR spectrum ( $\text{DMSO}-d_6$ , 100 MHz) of intermediate **7**.  
Figure S38. The  $^1\text{H}$  NMR spectrum ( $\text{acetone}-d_6$ , 400 MHz) of intermediate **8**.  
Figure S39. The  $^{13}\text{C}$  NMR spectrum ( $\text{acetone}-d_6$ , 100 MHz) of intermediate **8**.  
Figure S40. The  $^1\text{H}$  NMR spectrum ( $\text{CDCl}_3$ , 400 MHz) of synthetic intermediate **9**.  
Figure S41. The  $^{13}\text{C}$  NMR spectrum ( $\text{CDCl}_3$ , 100 MHz) of synthetic intermediate **9**.  
Figure S42. The  $^1\text{H}$  NMR spectrum ( $\text{CDCl}_3$ , 400 MHz) of synthetic intermediate **5**.  
Figure S43. The  $^{13}\text{C}$  NMR spectrum ( $\text{CDCl}_3$ , 150 MHz) of synthetic intermediate **5**.  
Figure S44. The  $^1\text{H}$  NMR spectrum ( $\text{CDCl}_3$ , 400 MHz) of synthetic intermediate **10**.  
Figure S45. The  $^{13}\text{C}$  NMR spectrum ( $\text{CDCl}_3$ , 100 MHz) of synthetic intermediate **10**.

#### **VI. The NMR, HREIMS, and UV spectra of synthetic lingzhifuran A (1).**

Figure S46. The  $^1\text{H}$  NMR spectrum ( $\text{acetone}-d_6$ , 400 MHz) of synthetic **1**.  
Figure S47. The  $^{13}\text{C}$  NMR spectrum ( $\text{acetone}-d_6$ , 150 MHz) of synthetic **1**.  
Figure S48. The DEPT spectra ( $\text{acetone}-d_6$ , 150 MHz) of synthetic **1**.  
Figure S49. The  $^1\text{H}$ - $^1\text{H}$  COSY spectrum ( $\text{acetone}-d_6$ , 600 MHz) of synthetic **1**.  
Figure S50. The HSQC spectrum ( $\text{acetone}-d_6$ , 600 MHz) of synthetic **1**.  
Figure S51. The HMBC spectrum ( $\text{acetone}-d_6$ , 600 MHz) of synthetic **1**.  
Figure S52. The ROESY spectrum ( $\text{acetone}-d_6$ , 600 MHz) of synthetic **1**.  
Figure S53. The enlarged ROESY spectrum ( $\text{acetone}-d_6$ , 600 MHz) of synthetic **1**.  
Figure S54. The HRESIMS (negative) spectrum of synthetic **1**.  
Figure S55. The UV spectrum ( $\text{MeOH}$ ) of synthetic **1**.

#### **VII. Comparison of natural 1 and synthetic 1.**

Table S1.  $^1\text{H}$  and  $^{13}\text{C}$  NMR data of **1** in  $\text{acetone}-d_6$  ( $\delta$  in ppm,  $J$  in Hz).  
Figure S56. HPLC analysis of natural and synthetic of **1**.

#### **VIII. X-ray data of (-)-2.**

# I. The NMR, HREIMS, and UV spectra of natural lingzhifuran A (1).

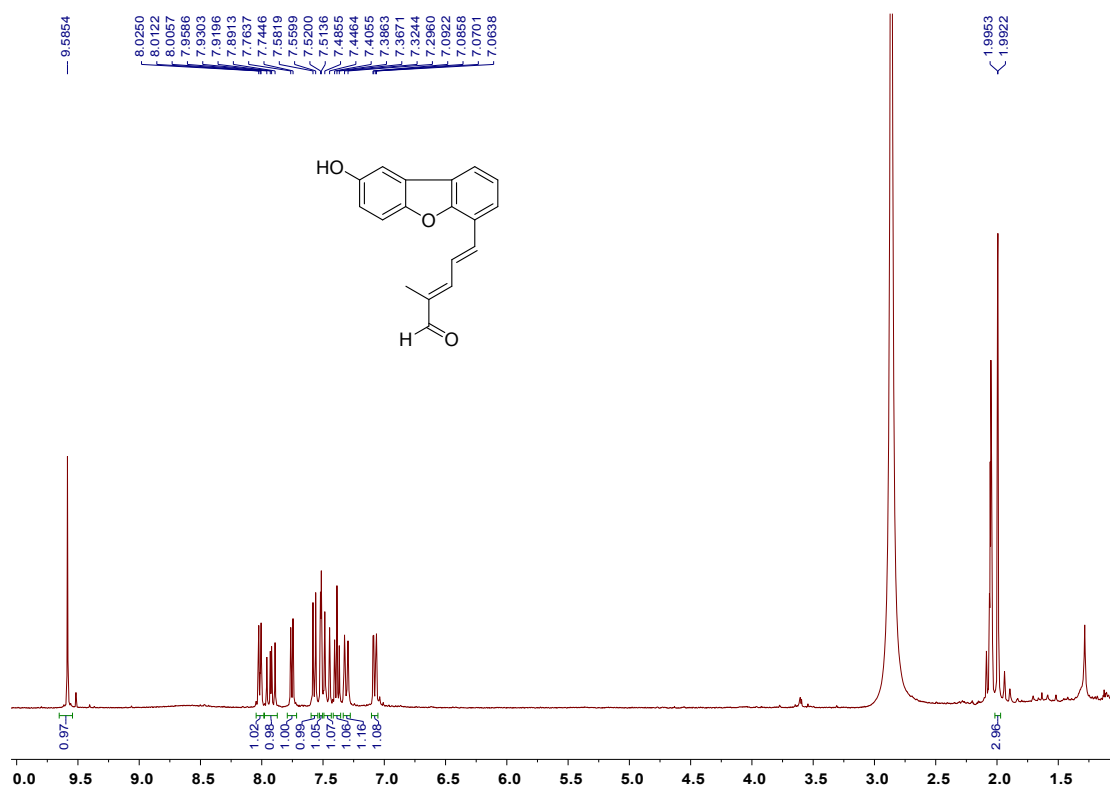

Figure S1. The <sup>1</sup>H NMR spectrum (acetone-*d*<sub>6</sub>, 400 MHz) of 1.

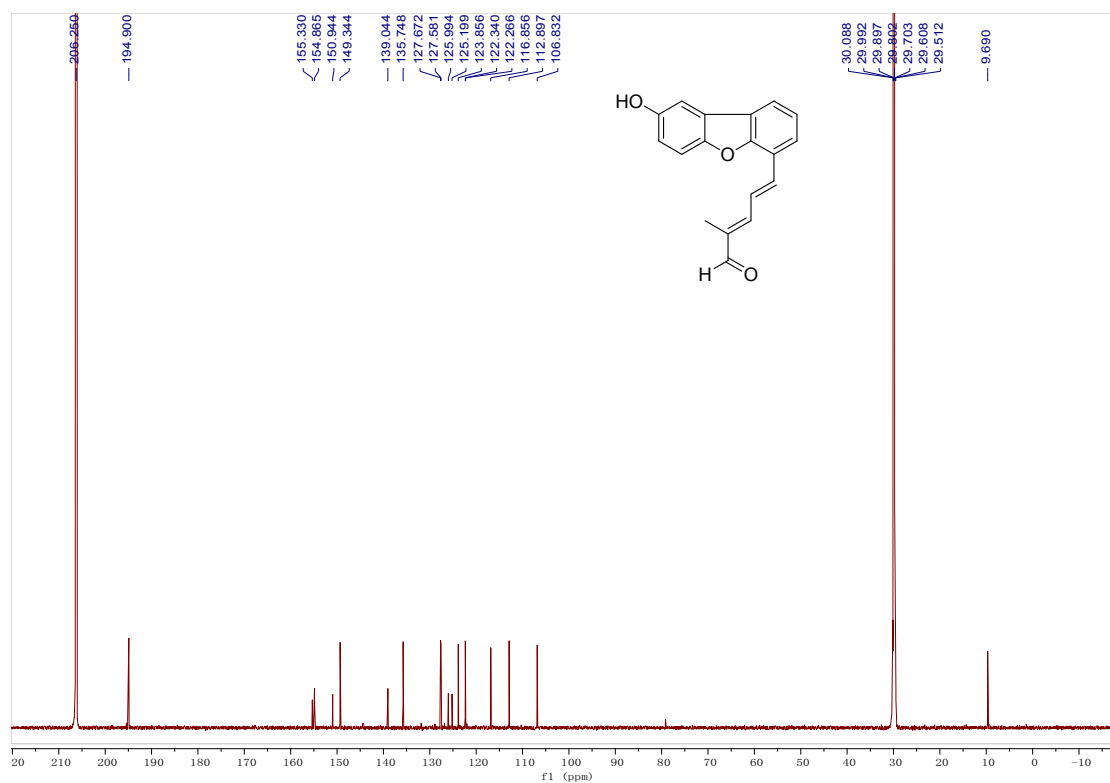

Figure S2. The <sup>13</sup>C NMR spectrum (acetone-*d*<sub>6</sub>, 200 MHz) of 1.

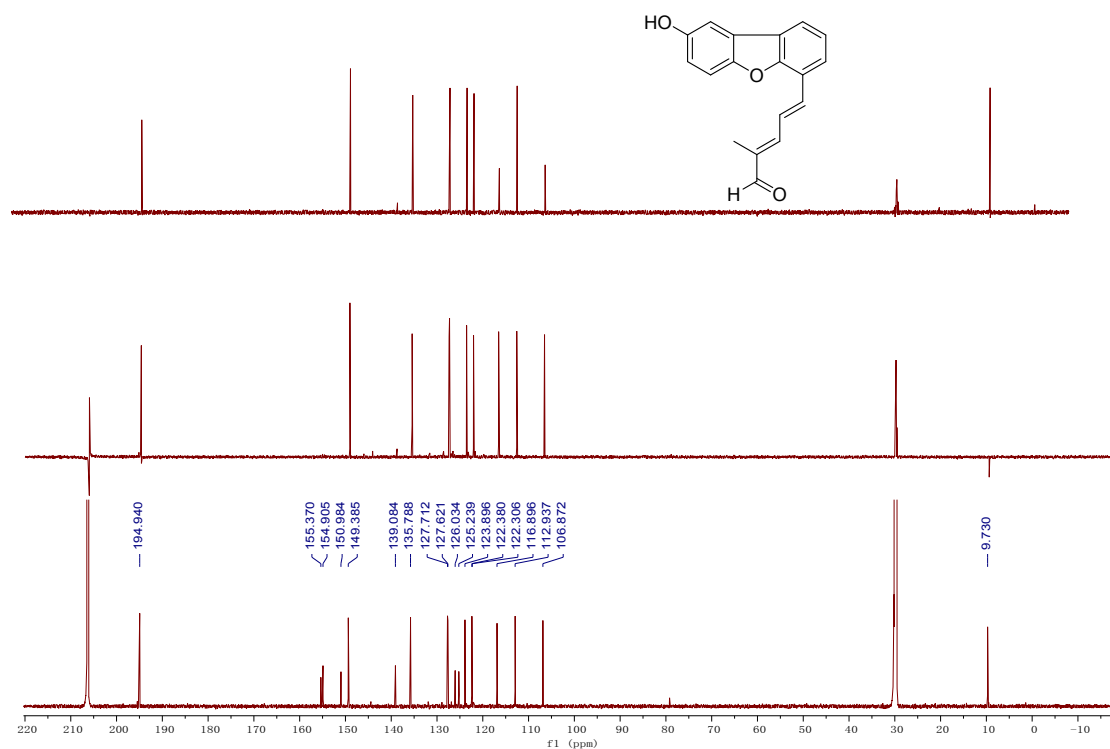

Figure S3. The DEPT spectra (acetone- $d_6$ , 200 MHz) of **1**.

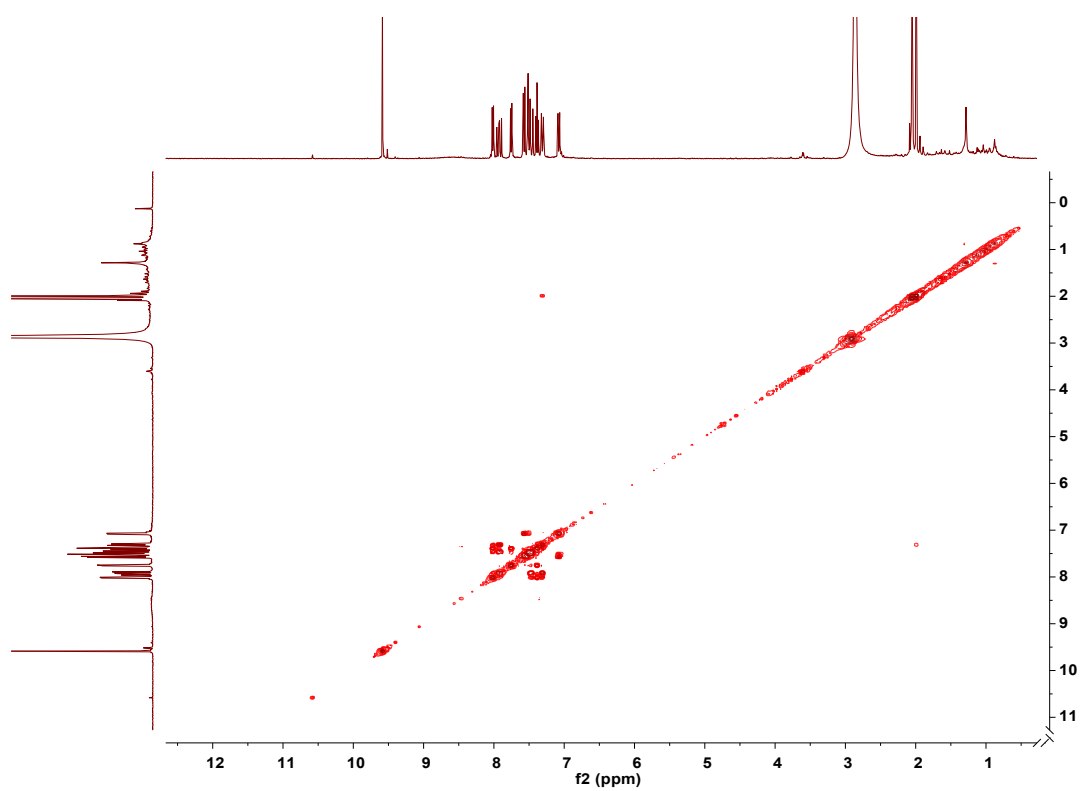

Figure S4. The  $^1\text{H}$ - $^1\text{H}$  COSY spectrum (acetone- $d_6$ , 800 MHz) of **1**.

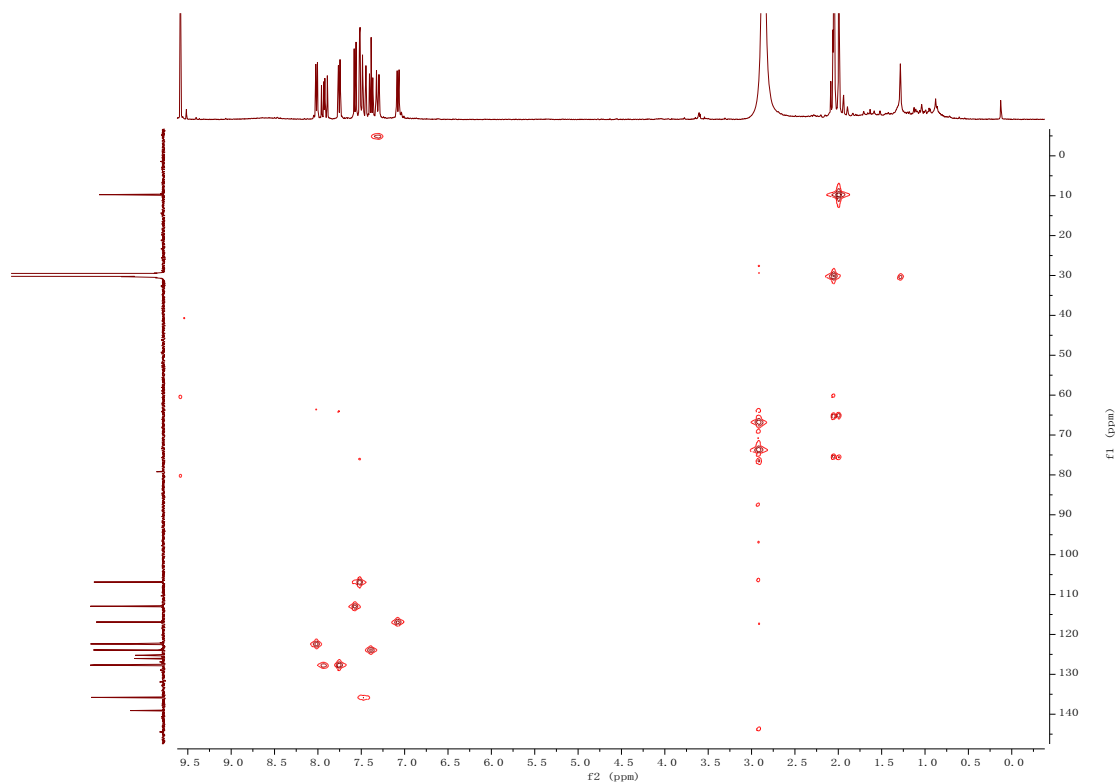

Figure S5. The HMQC spectrum (acetone- $d_6$ , 800 MHz) of **1**.

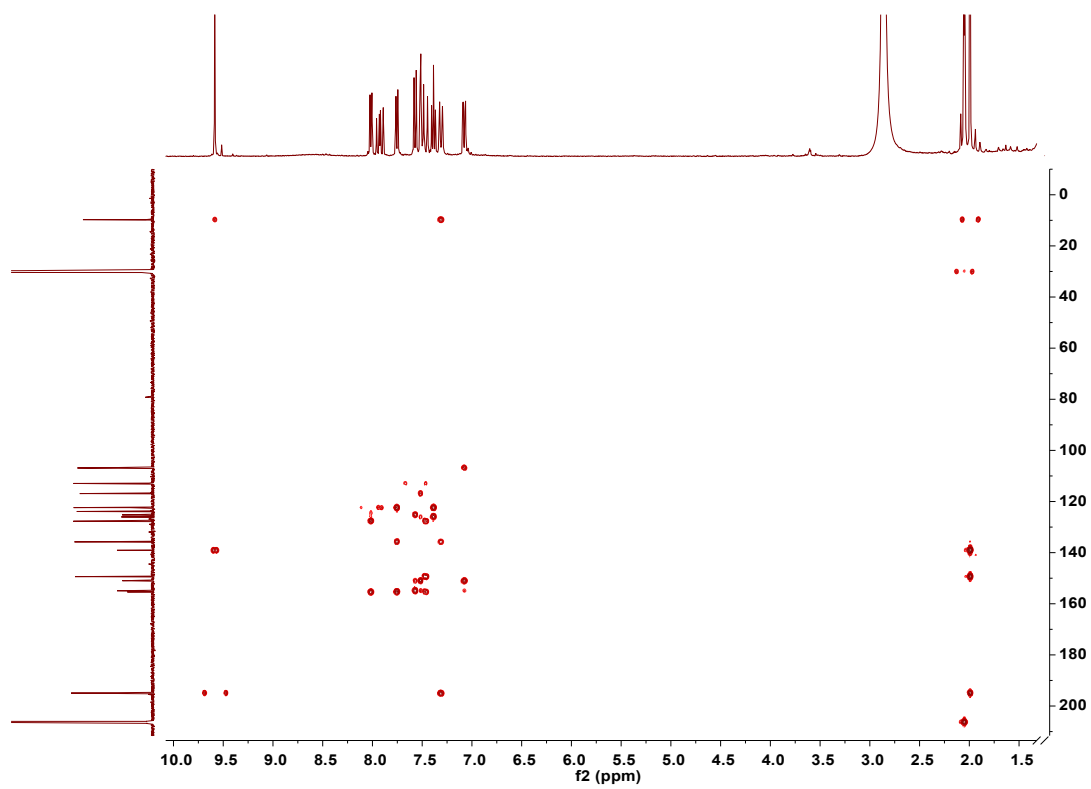

Figure S6. The HMBC spectrum (acetone- $d_6$ , 800 MHz) of **1**.

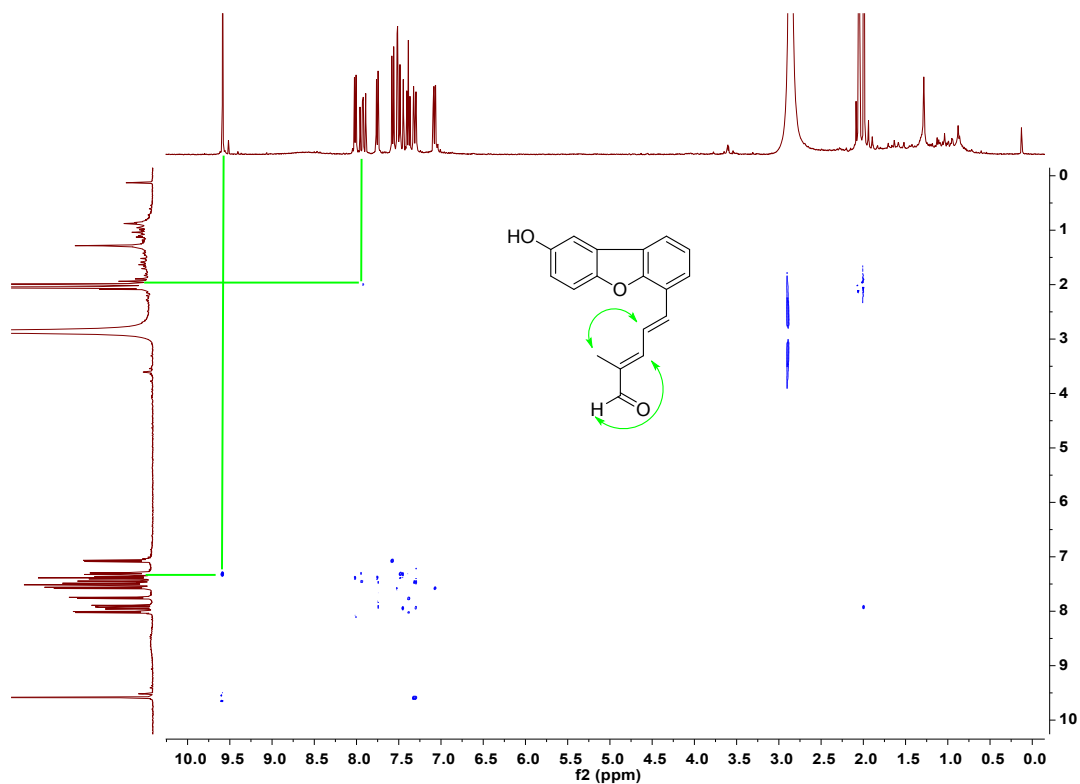

Figure S7. The ROESY spectrum (acetone- $d_6$ , 800 MHz) of **1**.

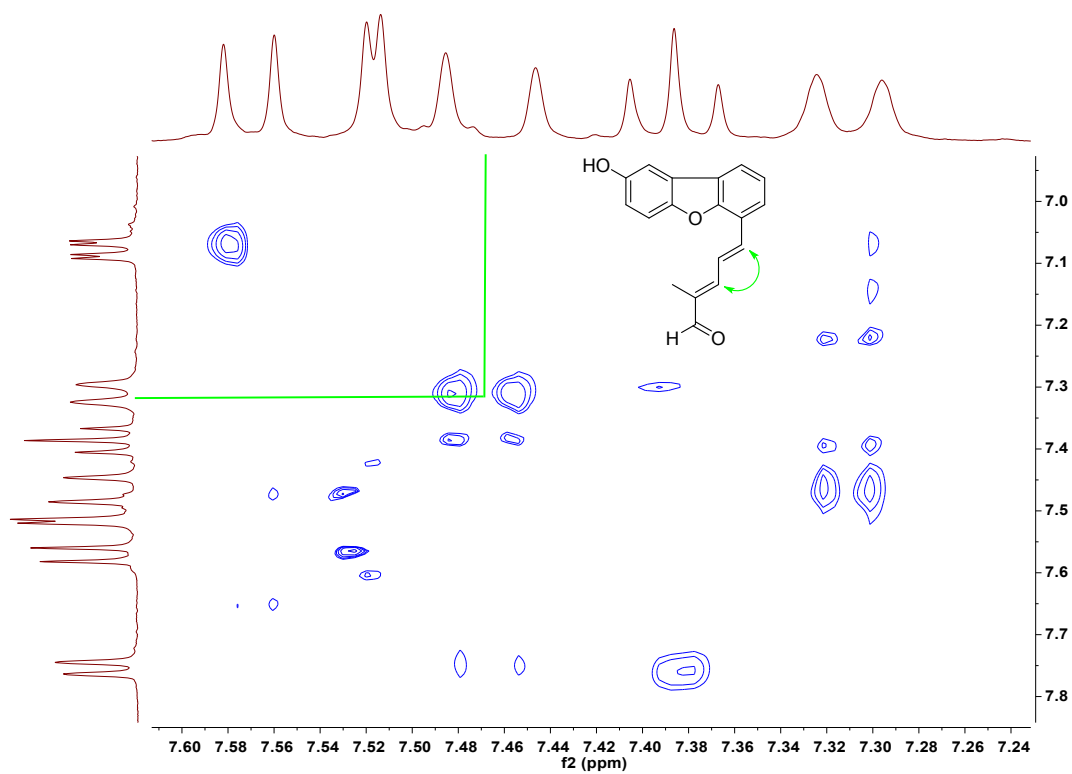

Figure S8. The enlarged ROESY spectrum (acetone- $d_6$ , 800 MHz) of **1**.

## Single Mass Analysis

Tolerance = 10.0 PPM / DBE: min = -10.0, max = 120.0

Selected filters: None

Monoisotopic Mass, Odd and Even Electron Ions

13 formula(e) evaluated with 1 results within limits (up to 51 closest results for each mass)

Elements Used:

C: 0-200 H: 0-400 O: 3-5

QLZ-223

11:56:44 14-Mar-2014

Voltage E1+

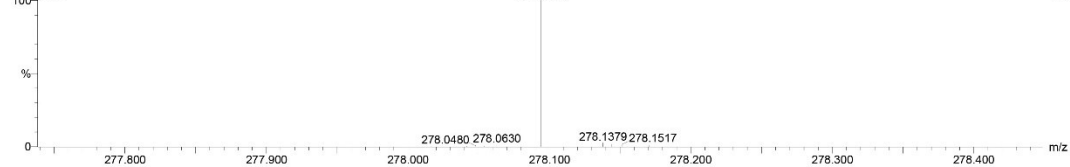Minimum: -10.0  
Maximum: 200.0 10.0 120.0

| Mass     | Calc. Mass | mDa  | PPM  | DBE  | I-FIT     | Formula    |
|----------|------------|------|------|------|-----------|------------|
| 278.0942 | 278.0943   | -0.1 | -0.4 | 12.0 | 5546371.0 | C18 H14 O3 |

Figure S9. The HREI (positive) spectrum of **1**.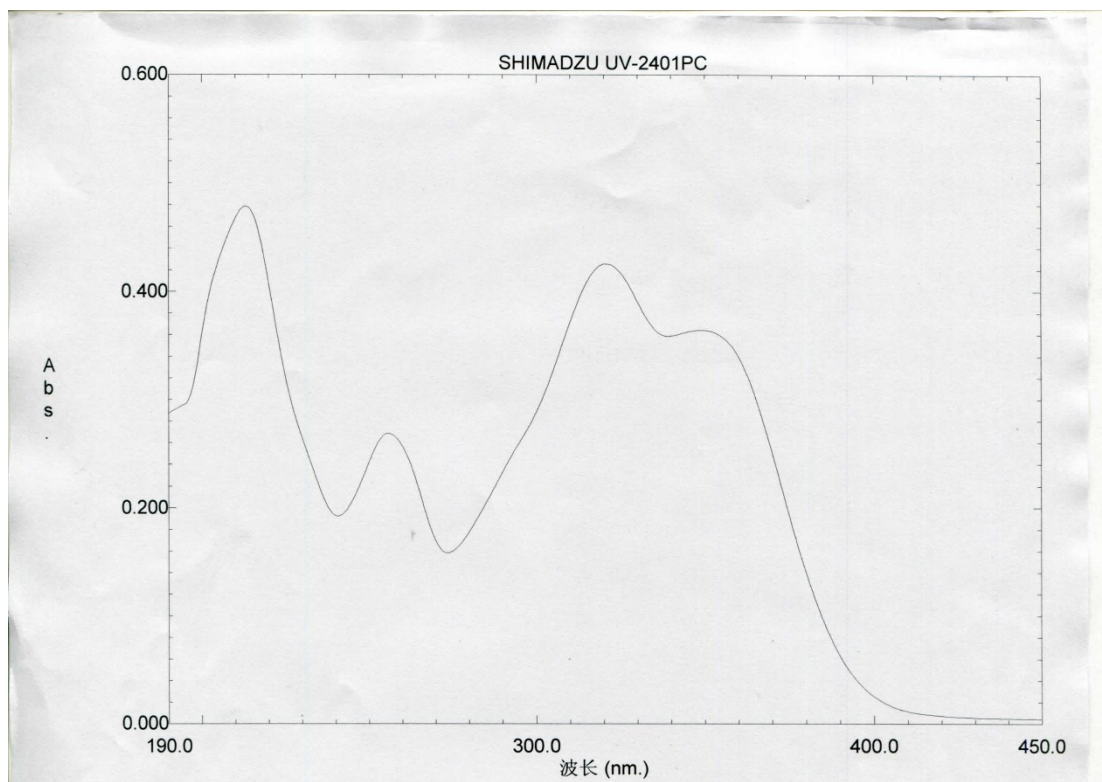Figure S10. The UV spectrum (MeOH) of **1**.



## II. The NMR, HRESIMS and CD spectra of lingzhiactone D (2).

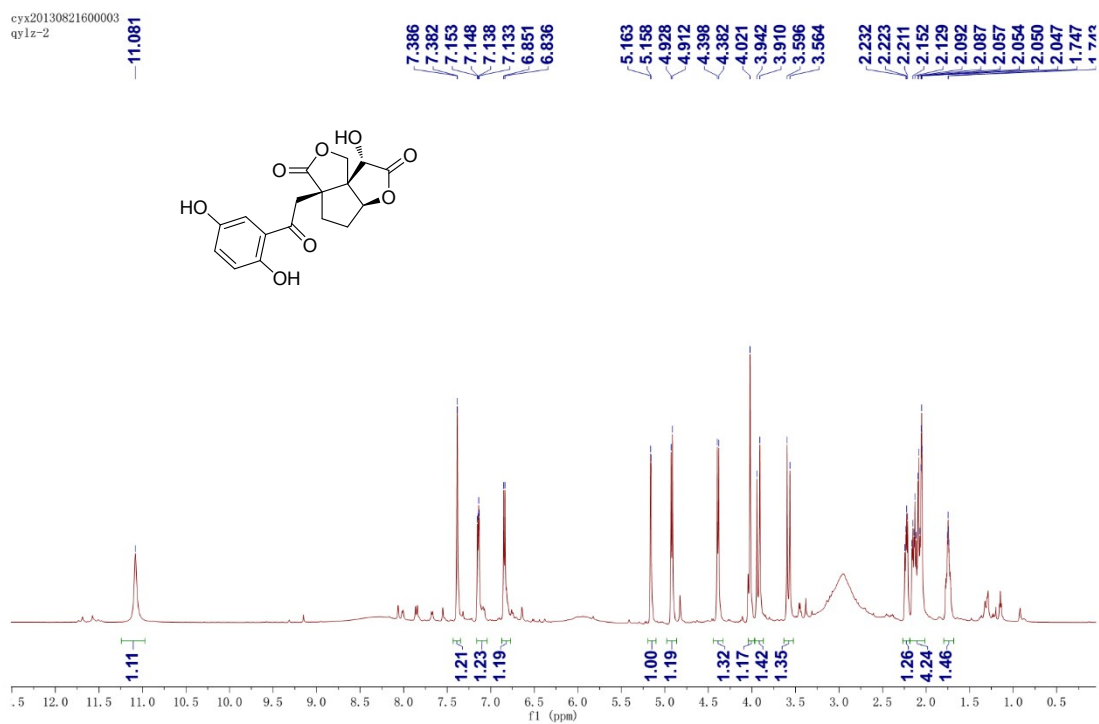

Figure S11. The  $^1\text{H}$  NMR spectrum (acetone- $d_6$ , 600 MHz) of **2**.

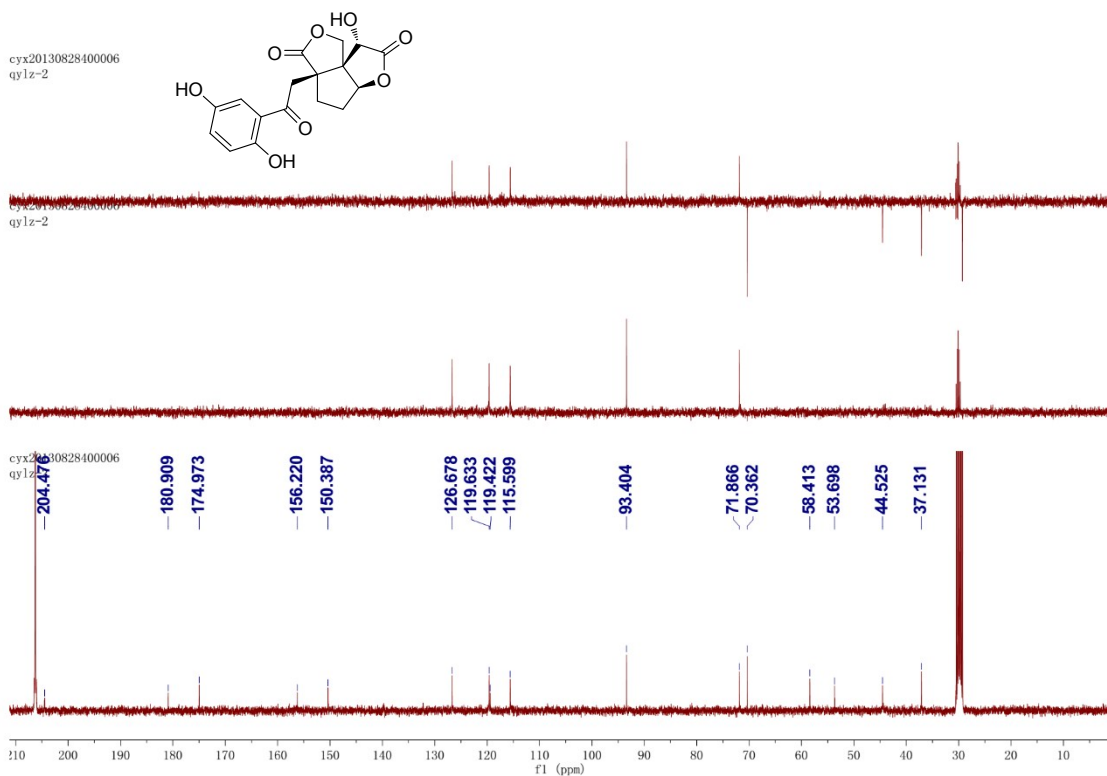

Figure S12. The DEPT spectra (acetone- $d_6$ , 150 MHz) of **2**.

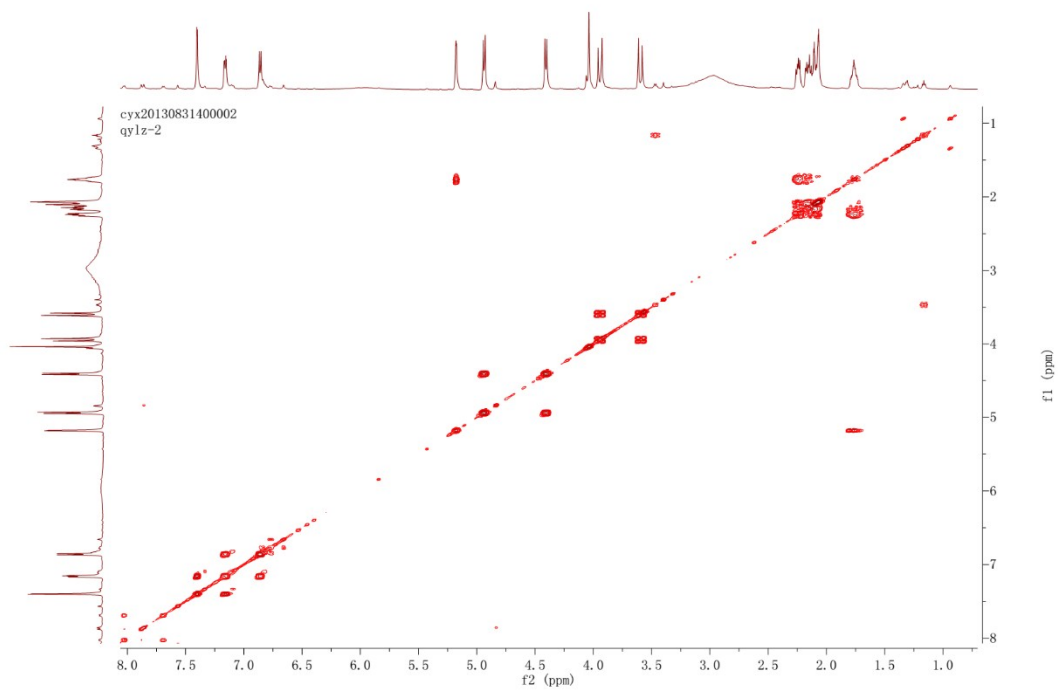

Figure S13. The  $^1\text{H}$ - $^1\text{H}$  COSY spectrum (acetone- $d_6$ , 600 MHz) of **2**.

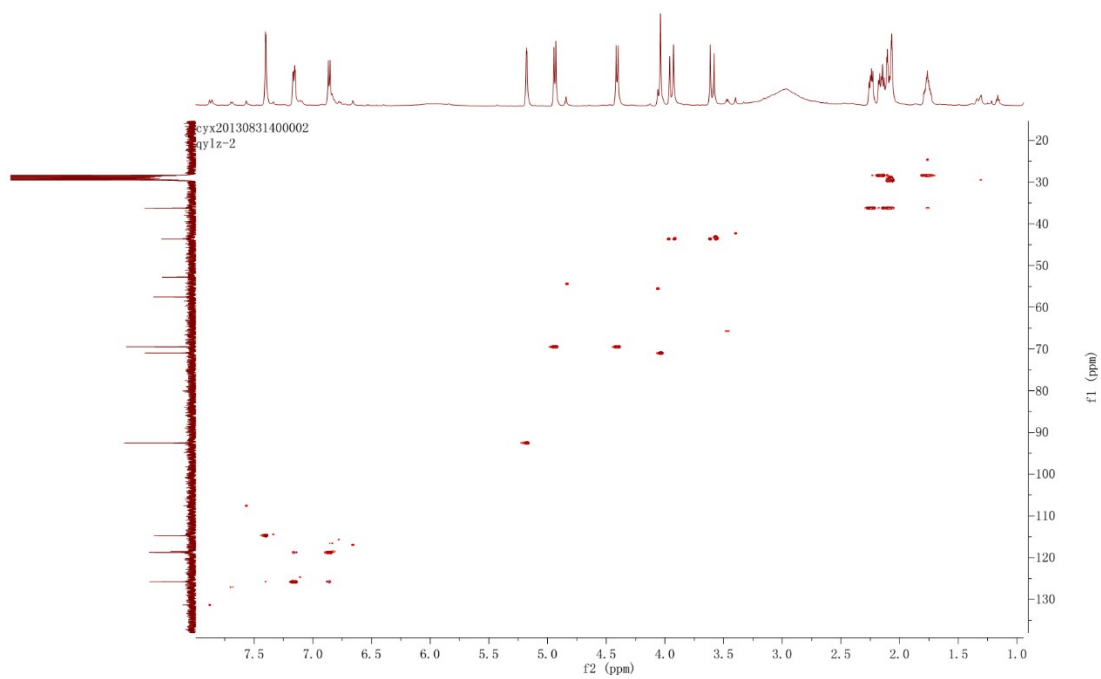

Figure S14. The HSQC spectrum (acetone- $d_6$ , 600 MHz) of **2**.

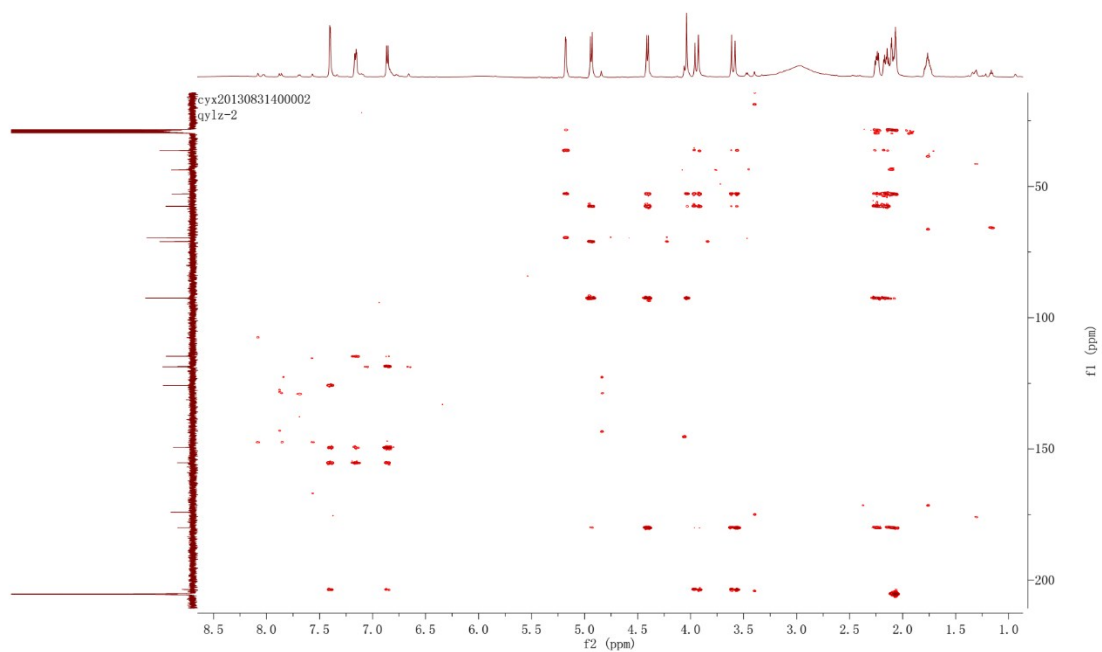

Figure S15. The HMBC spectrum (acetone- $d_6$ , 600 MHz) of **2**.

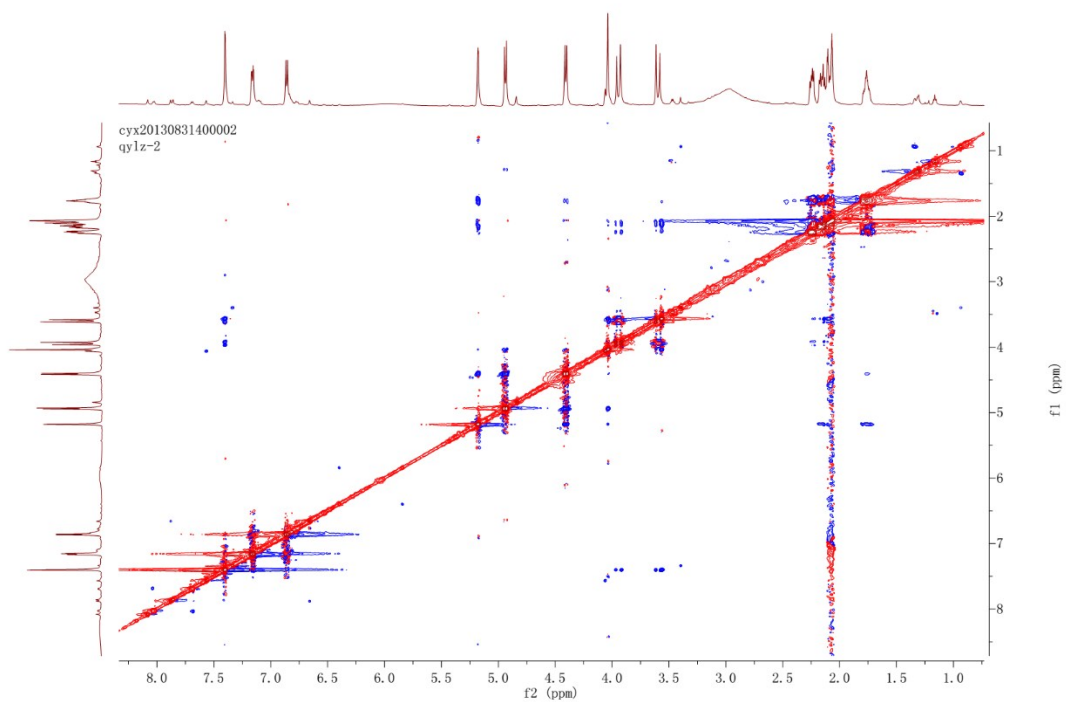

Figure S16. The ROESY spectrum (acetone- $d_6$ , 600 MHz) of **2**.

## Qualitative Analysis Report

|                               |                      |                      |                       |
|-------------------------------|----------------------|----------------------|-----------------------|
| <b>Data Filename</b>          | ESINA1 qylz-2.d      | <b>Sample Name</b>   | qylz-2                |
| <b>Sample Type</b>            | Sample               | <b>Position</b>      |                       |
| <b>Instrument Name</b>        | Agilent G6230 TOF MS | <b>User Name</b>     | KIB                   |
| <b>Acq Method</b>             | ESIN.m               | <b>Acquired Time</b> | 9/25/2013 12:18:11 PM |
| <b>IRM Calibration Status</b> | Success              | <b>DA Method</b>     | demo.m                |
| <b>Comment</b>                |                      |                      |                       |

|                       |                             |
|-----------------------|-----------------------------|
| <b>Sample Group</b>   | <b>Info.</b>                |
| <b>Acquisition SW</b> | 6200 series TOF/6500 series |
| <b>Version</b>        | Q-TOF B.05.01 (B5125.1)     |

### User Spectra

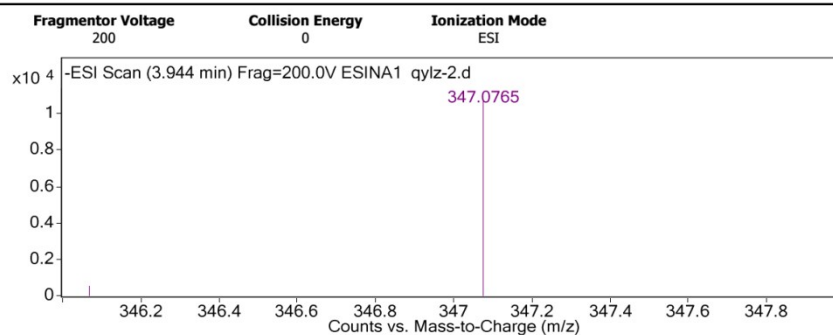

#### Formula Calculator Element Limits

| Element | Min | Max |
|---------|-----|-----|
| C       | 0   | 200 |
| H       | 0   | 400 |
| O       | 7   | 9   |

#### Formula Calculator Results

| Formula    | Calculated Mass | Measured Mass | Diff. (mDa) | Diff. (ppm) | DBE  |
|------------|-----------------|---------------|-------------|-------------|------|
| C17 H15 O8 | 347.0767        | 347.0760      | 0.7         | 2.1         | 10.5 |

--- End Of Report ---

Figure S17. HRESIMS (negative) spectrum of **2**.

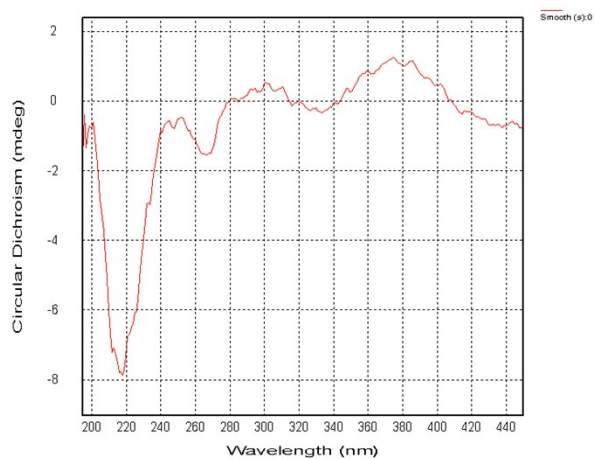

Figure S18. The experiment CD spectrum (+)-(2).

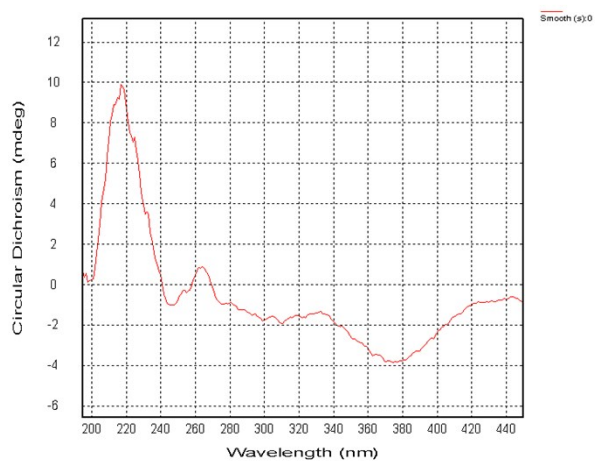

Figure S19. The experiment CD spectrum (-)-(2).

### III. The NMR, HRESIMS and CD spectra of lingzhilactone E (3).

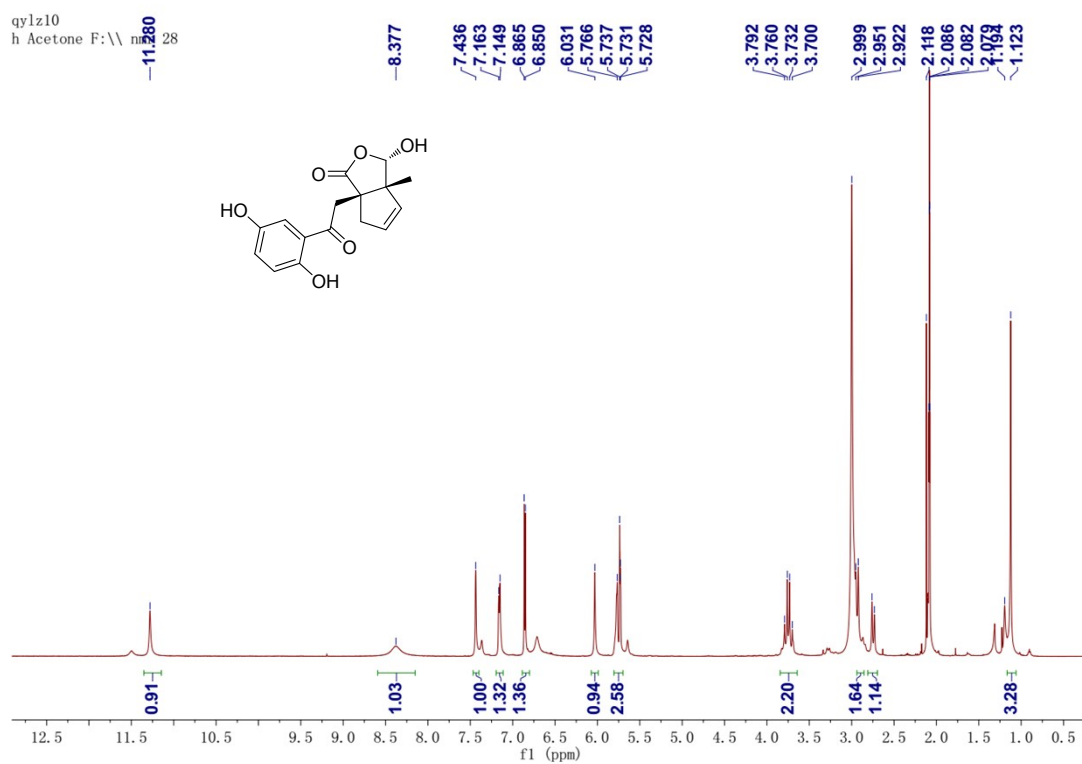

Figure S20. The  $^1\text{H}$  NMR spectrum (acetone- $d_6$ , 600 MHz) of **3**.

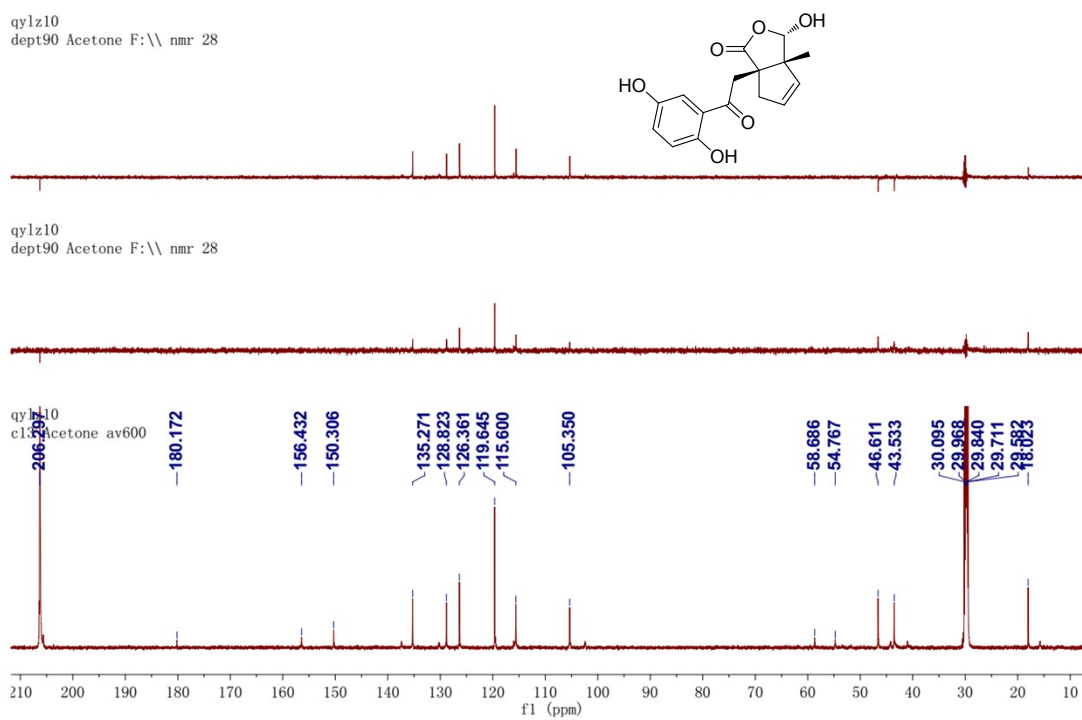

Figure S21. The DEPT spectra (acetone- $d_6$ , 150 MHz) of **3**.

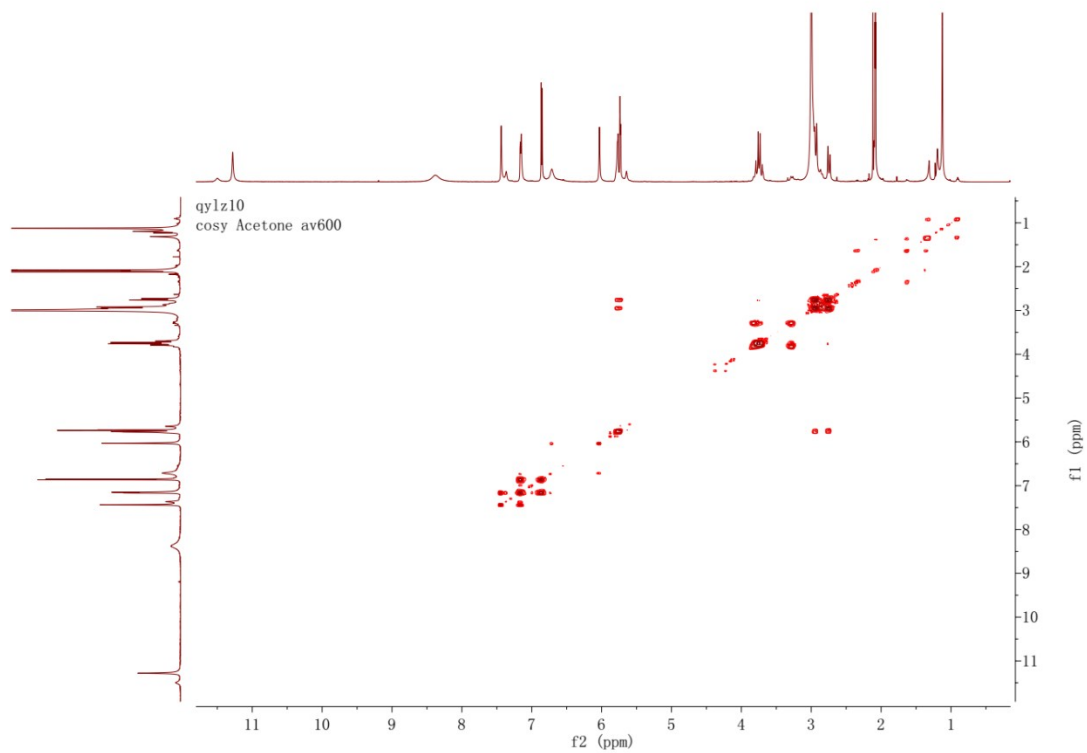

Figure S22. The  $^1\text{H}$ - $^1\text{H}$  COSY spectrum (acetone- $d_6$ , 600 MHz) of **3**.

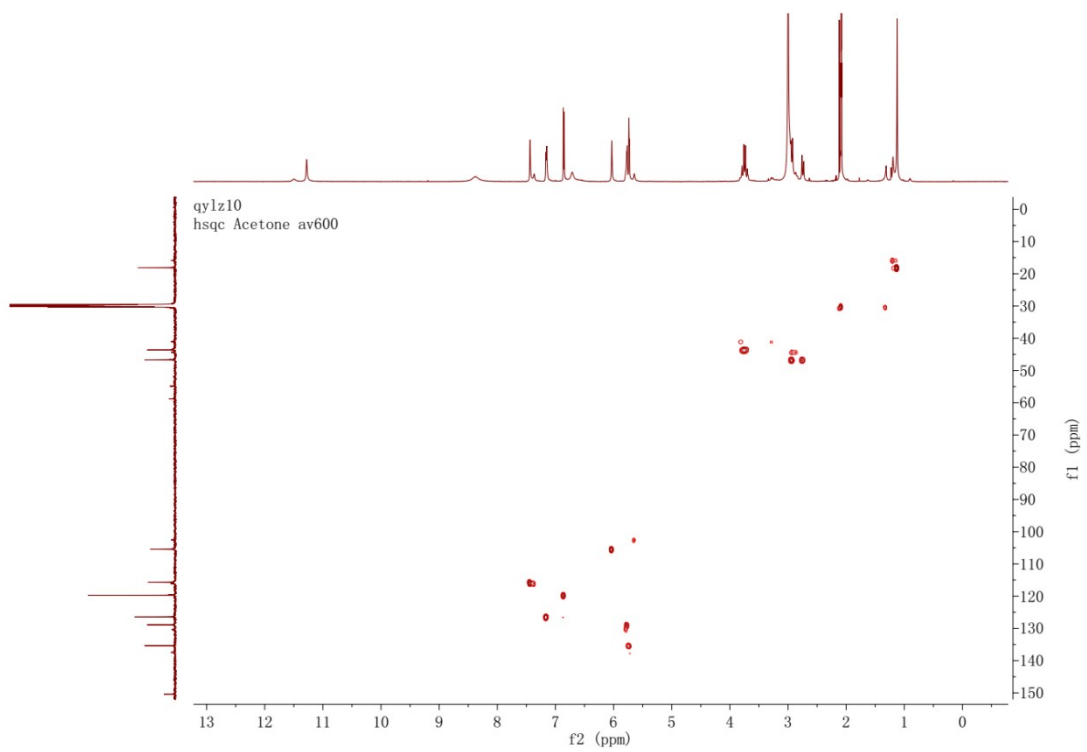

Figure S23. The HSQC spectrum (acetone- $d_6$ , 600 MHz) of **3**.

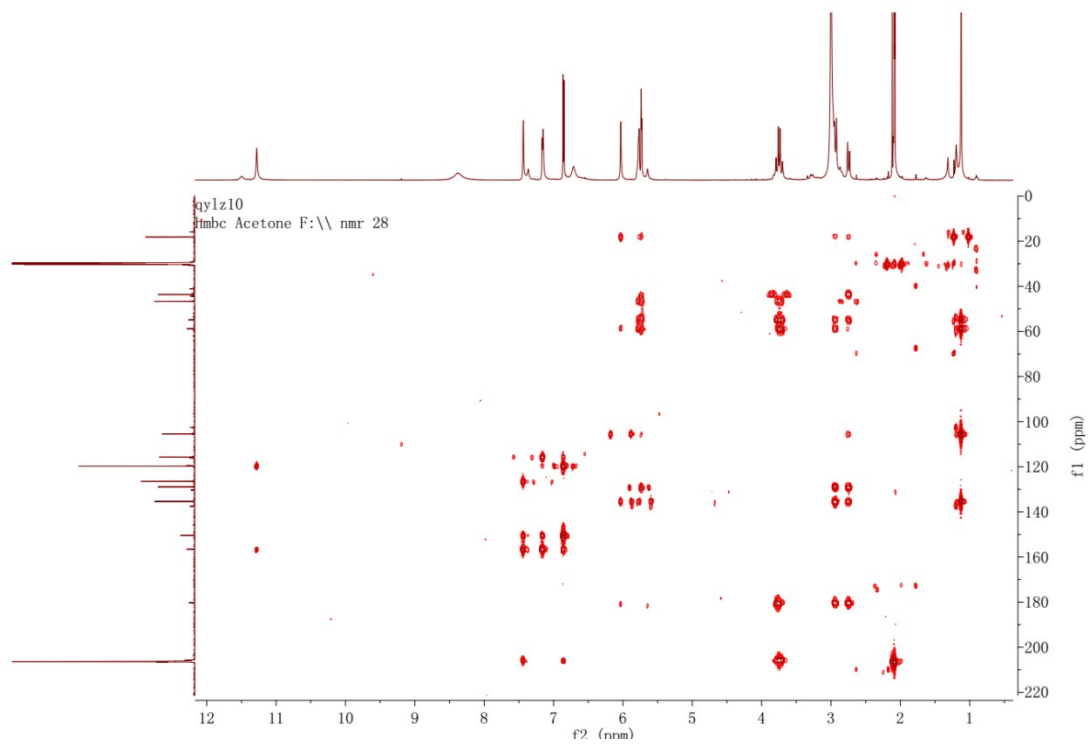

Figure S24. The HMBC spectrum (acetone- $d_6$ , 600 MHz) of **3**.

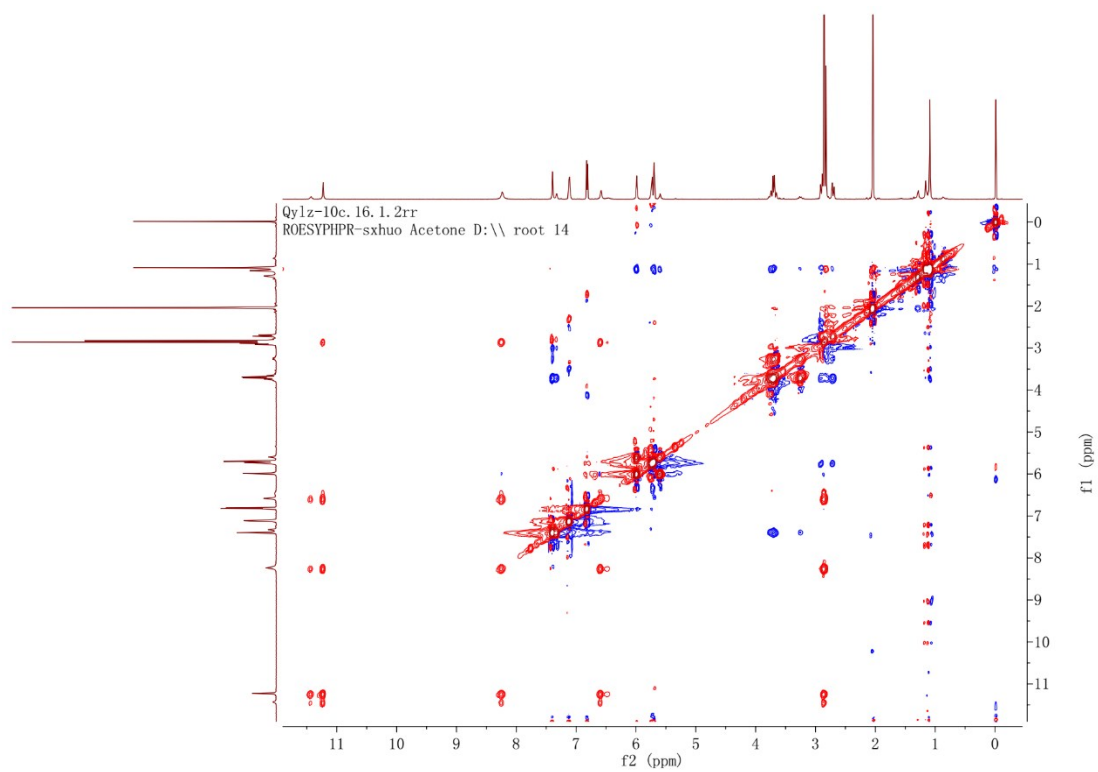

Figure S25. The ROESY spectrum (acetone- $d_6$ , 600 MHz) of **3**.



## Qualitative Analysis Report

|                               |              |                      |                      |
|-------------------------------|--------------|----------------------|----------------------|
| <b>Data Filename</b>          | Qylz-10c.d   | <b>Sample Name</b>   | Qylz-10c             |
| <b>Sample Type</b>            | Sample       | <b>Position</b>      | P1-C4                |
| <b>Instrument Name</b>        | Instrument 1 | <b>User Name</b>     |                      |
| <b>Acq Method</b>             | SIBU-ESI-i.m | <b>Acquired Time</b> | 6/28/2016 3:49:34 PM |
| <b>IRM Calibration Status</b> | Success      | <b>DA Method</b>     | ESI+.m               |
| <b>Comment</b>                |              |                      |                      |

|                       |                             |
|-----------------------|-----------------------------|
| <b>Sample Group</b>   | <b>Info.</b>                |
| <b>Acquisition SW</b> | 6200 series TOF/6500 series |
| <b>Version</b>        | Q-TOF B.05.01 (B5125.2)     |

### User Spectra

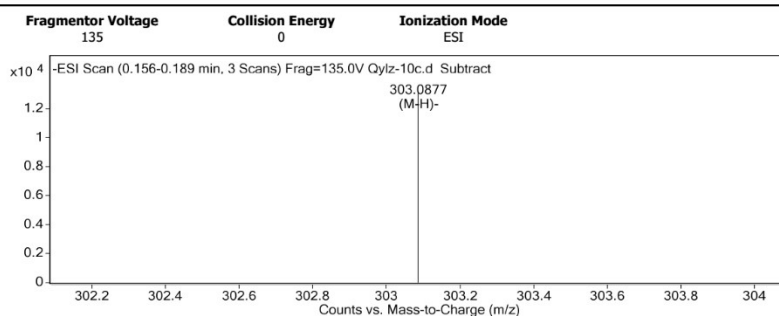

#### Peak List

| m/z      | z | Abund    | Formula    | Ion    |
|----------|---|----------|------------|--------|
| 61.9883  |   | 2987.72  |            |        |
| 68.9958  |   | 1350.24  |            |        |
| 112.9856 | 1 | 10002.41 |            |        |
| 201.0556 | 1 | 2158.59  |            |        |
| 259.0977 | 1 | 1117.12  |            |        |
| 303.0877 | 1 | 13112.16 | C16 H16 O6 | (M-H)- |
| 304.0911 | 1 | 2398.74  | C16 H16 O6 | (M-H)- |
| 417.0798 | 1 | 2817.1   |            |        |

#### Formula Calculator Element Limits

| Element | Min | Max |
|---------|-----|-----|
| C       | 3   | 60  |
| H       | 0   | 120 |
| O       | 0   | 30  |

#### Formula Calculator Results

| Formula    | CalculatedMass | CalculatedMz | Mz       | Diff. (mDa) | Diff. (ppm) | DBE    |
|------------|----------------|--------------|----------|-------------|-------------|--------|
| C16 H16 O6 | 304.0947       | 303.0874     | 303.0877 | -0.3        | -0.8        | 9.0000 |

--- End Of Report ---

Figure S26. The HRESIMS (negative) spectrum of **3**.

#### IV. The NMR, HRESIMS and CD spectra of lingzhilactone F (4).

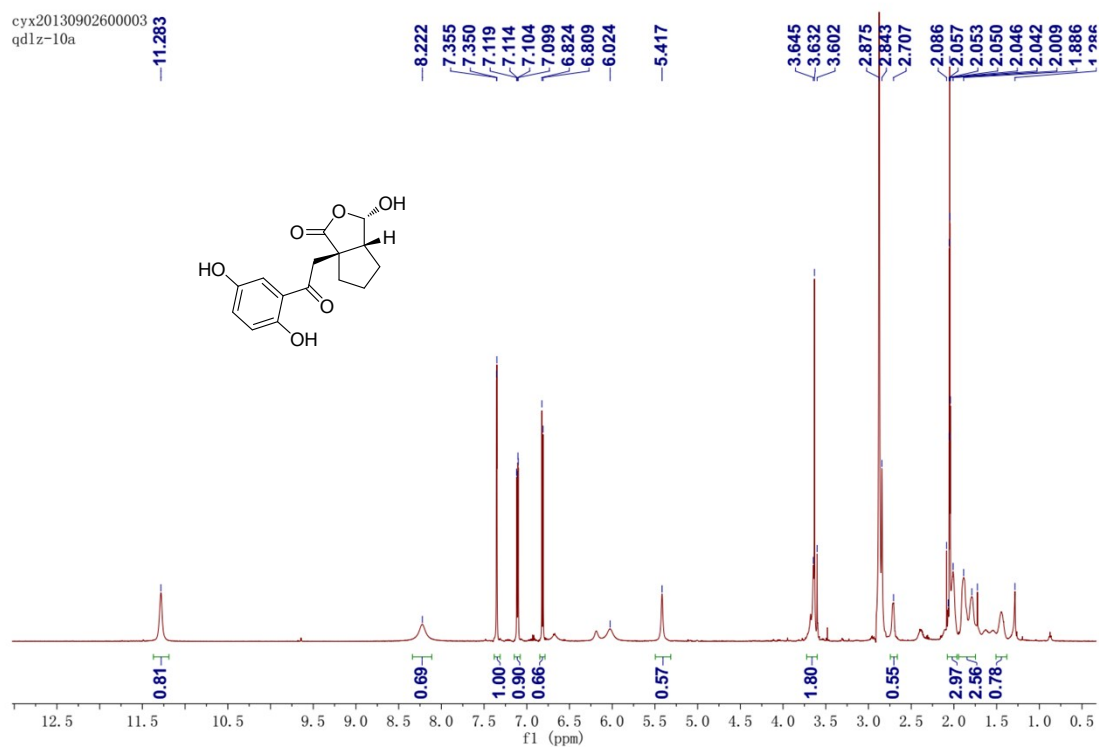

Figure S27. The  $^1\text{H}$  NMR spectrum (acetone- $d_6$ , 600 MHz) of 4.

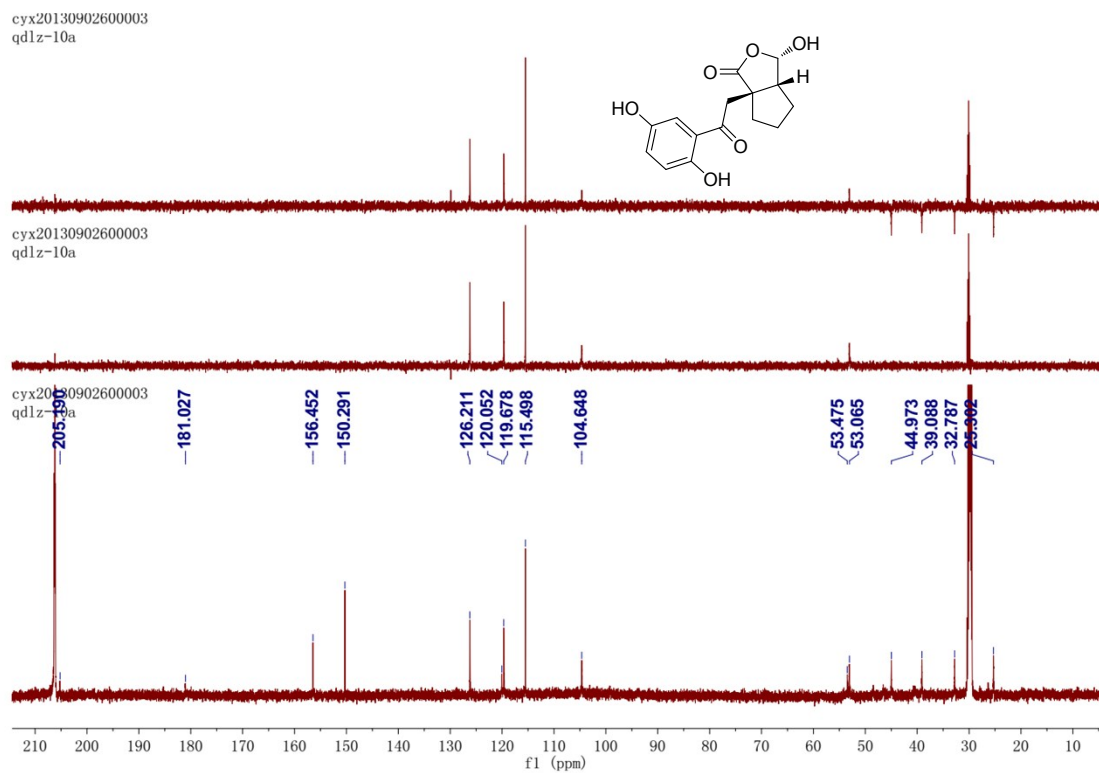

Figure S28. The DEPT spectra (acetone- $d_6$ , 150 MHz) of 4.

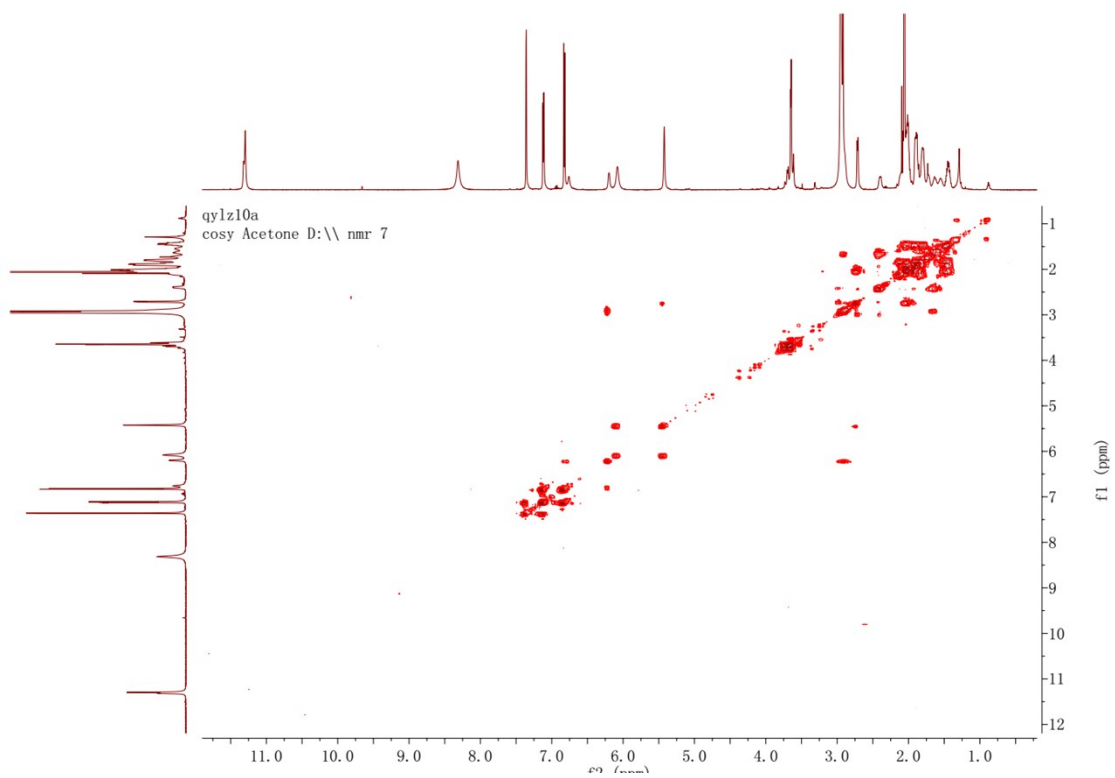

Figure S29. The <sup>1</sup>H-<sup>1</sup>H COSY spectrum (acetone-*d*<sub>6</sub>, 600 MHz) of **4**.

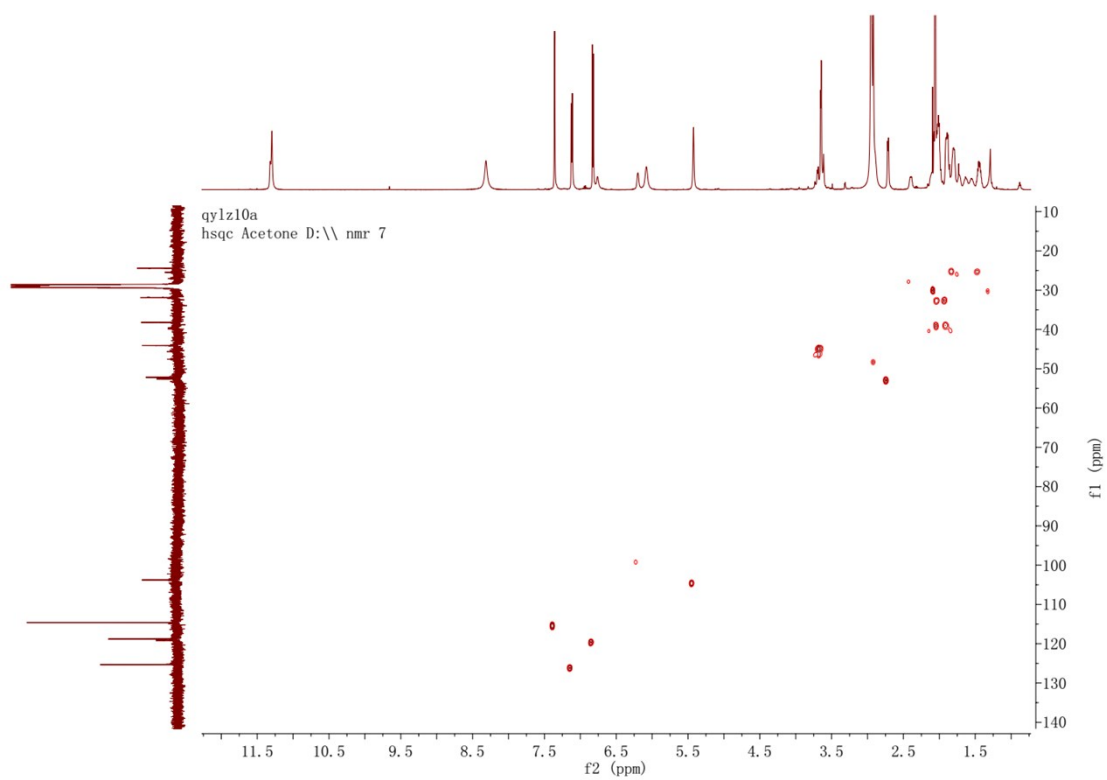

Figure S30. The HSQC spectrum (acetone-*d*<sub>6</sub>, 600 MHz) of **4**.

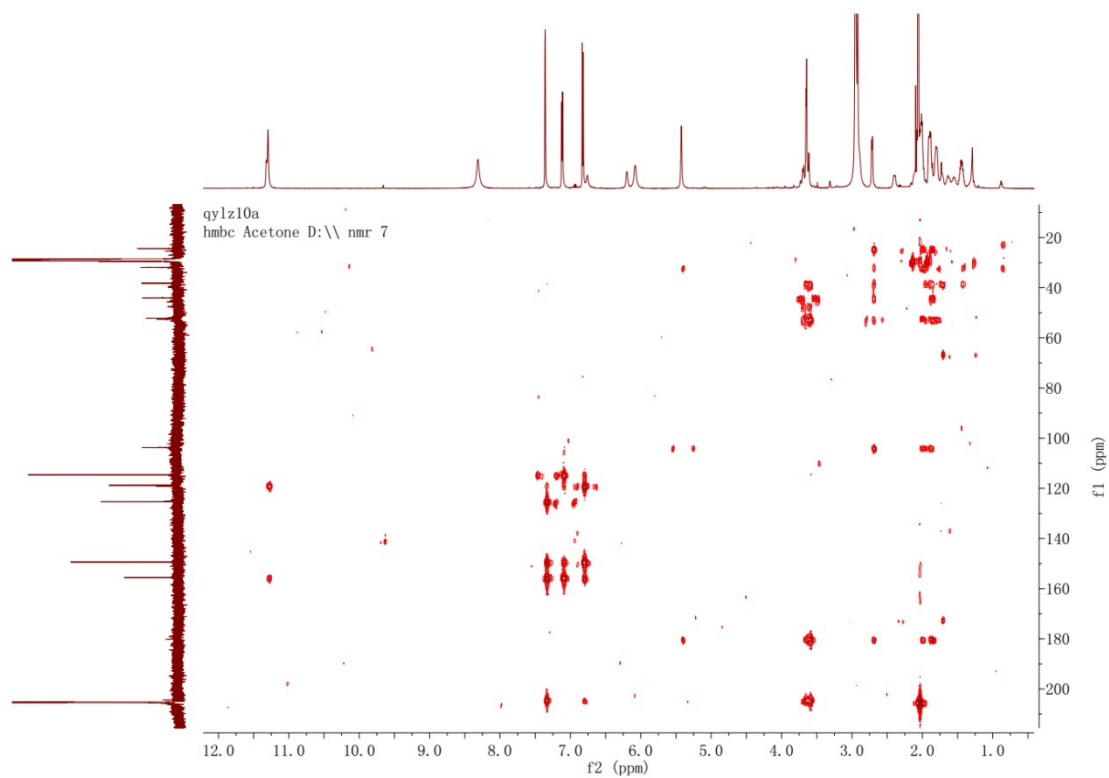

Figure S31. The HMBC spectrum (acetone- $d_6$ , 600 MHz) of **4**.

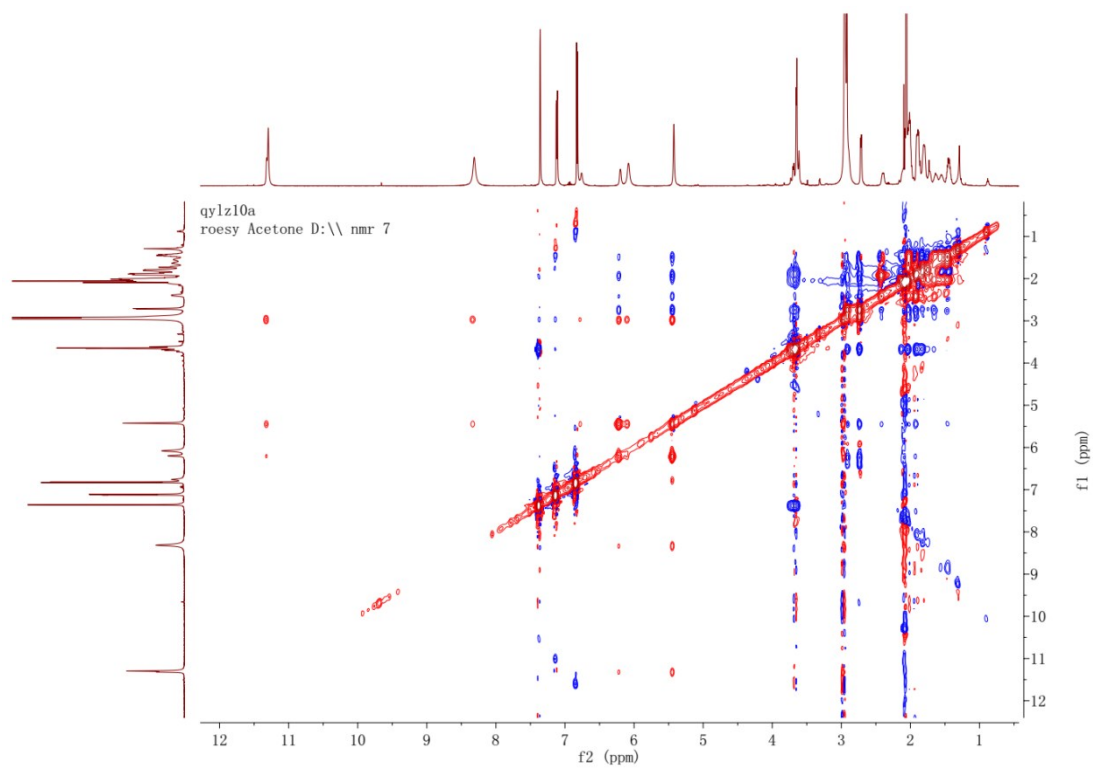

Figure S32. The ROESY spectrum (acetone- $d_6$ , 600 MHz) of **4**.

## Qualitative Analysis Report

|                        |              |               |                      |
|------------------------|--------------|---------------|----------------------|
| Data Filename          | Qylz-10b.d   | Sample Name   | Qylz-10b             |
| Sample Type            | Sample       | Position      | P1-C3                |
| Instrument Name        | Instrument 1 | User Name     |                      |
| Acq Method             | SIBU-ESI+.m  | Acquired Time | 6/28/2016 3:48:06 PM |
| IRM Calibration Status | Success      | DA Method     | ESI+.m               |

Comment

Sample Group Info.

Acquisition SW 6200 series TOF/6500 series

Version Q-TOF B.05.01 (B5125.2)

### User Spectra

|                    |                  |                 |
|--------------------|------------------|-----------------|
| Fragmentor Voltage | Collision Energy | Ionization Mode |
| 135                | 0                | ESI             |

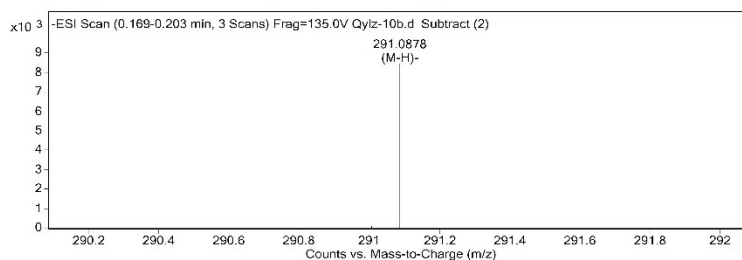

#### Peak List

| m/z      | z | Abund   | Formula    | Ion    |
|----------|---|---------|------------|--------|
| 95.0502  | 1 | 1025.16 |            |        |
| 112.9856 |   | 1370.31 |            |        |
| 139.0401 | 1 | 6231    |            |        |
| 151.0403 |   | 682.73  |            |        |
| 291.0878 | 1 | 8447.57 | C15 H16 O6 | (M-H)- |
| 292.0921 | 1 | 2117.58 | C15 H16 O6 | (M-H)- |
| 405.0788 | 1 | 1053.73 |            |        |
| 564.1878 | 1 | 1040.49 |            |        |

#### Formula Calculator Element Limits

| Element | Min | Max |
|---------|-----|-----|
| C       | 3   | 60  |
| H       | 0   | 120 |
| O       | 0   | 30  |

#### Formula Calculator Results

| Formula    | CalculatedMass | CalculatedMz | Mz       | Diff. (mDa) | Diff. (ppm) | DBE    |
|------------|----------------|--------------|----------|-------------|-------------|--------|
| C15 H16 O6 | 292.0947       | 291.0674     | 291.0878 | -0.6        | -2.2        | 8.0000 |

--- End Of Report ---

Figure S33. The HRESIMS (negative) spectrum of 4.

V. The NMR spectra of synthetic intermediates 5-10.

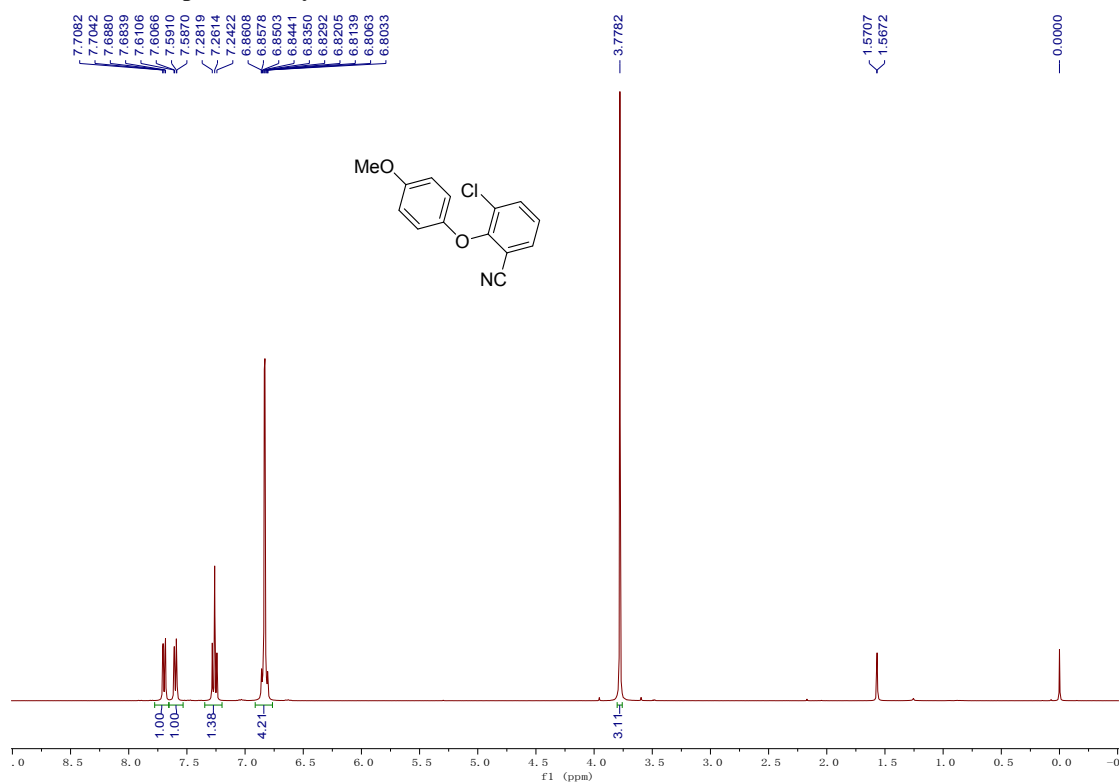

Figure S34. The  $^1\text{H}$  NMR spectrum ( $\text{CDCl}_3$ , 400 MHz) of synthetic intermediate 6.

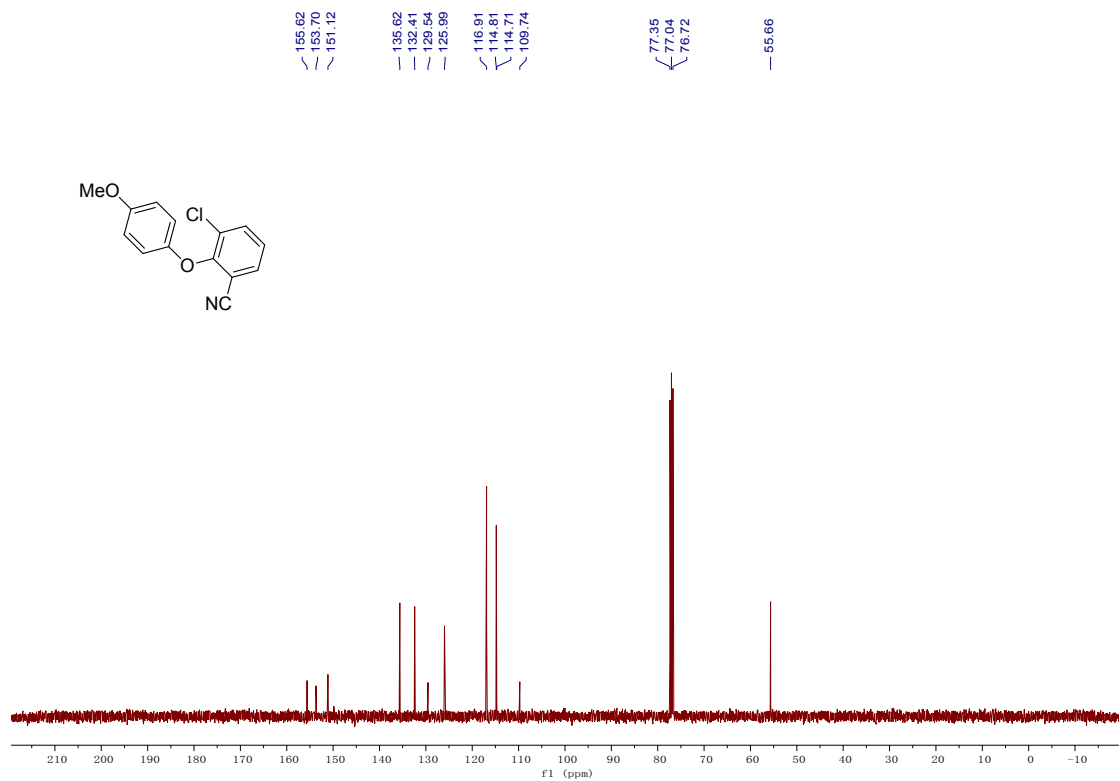

Figure S35. The  $^{13}\text{C}$  NMR spectrum ( $\text{CDCl}_3$ , 100 MHz) of synthetic intermediate 6.

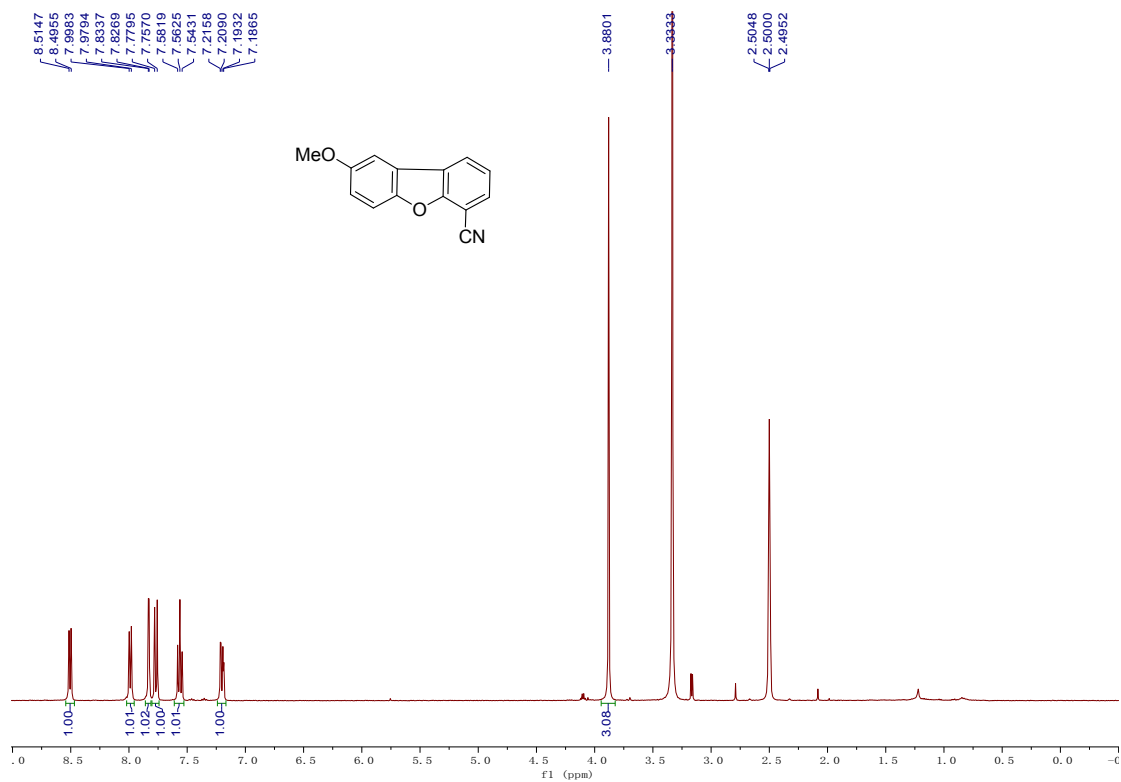

Figure S36. The <sup>1</sup>H NMR spectrum (DMSO-*d*<sub>6</sub>, 400 MHz) of intermediate 7.

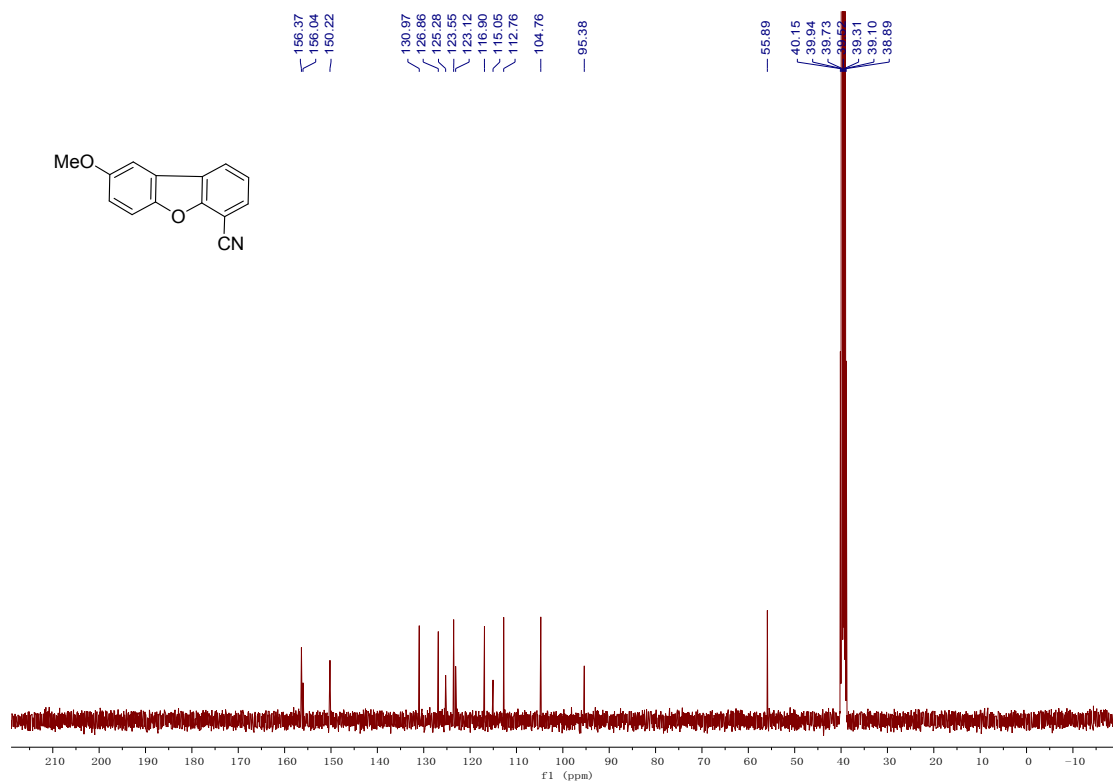

Figure S37. The <sup>13</sup>C NMR spectrum (DMSO-*d*<sub>6</sub>, 100 MHz) of intermediate 7.

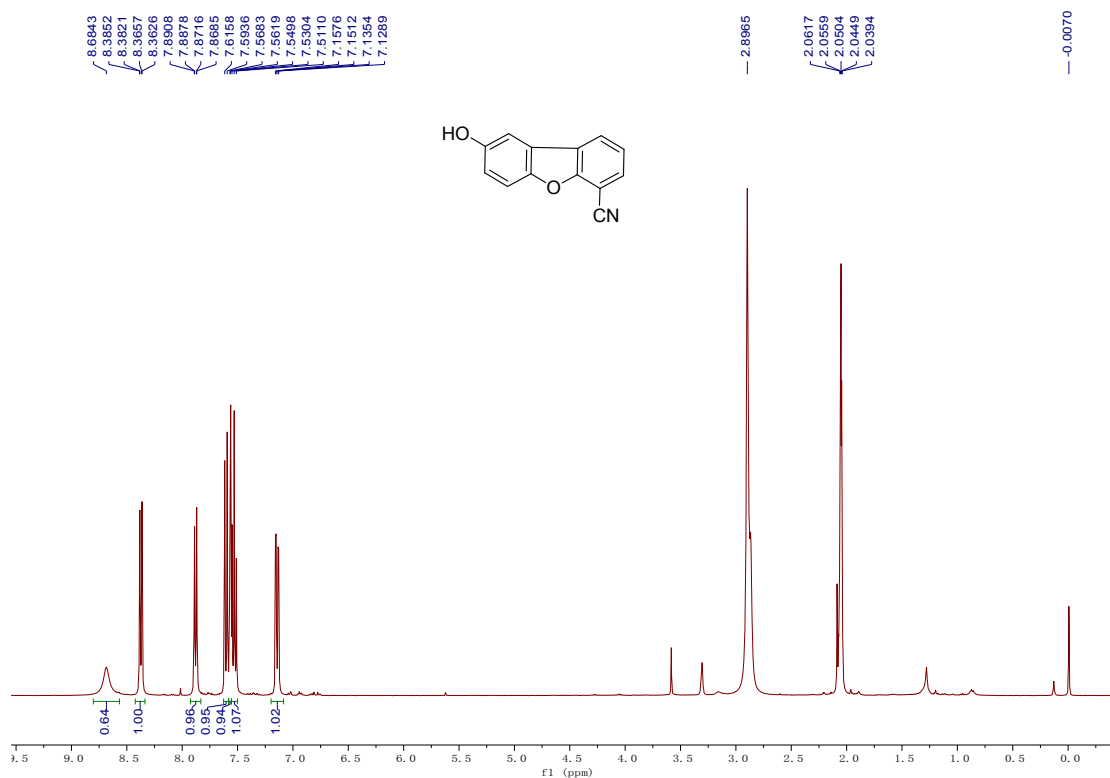

Figure S38. The <sup>1</sup>H NMR spectrum (acetone-*d*<sub>6</sub>, 400 MHz) of intermediate **8**.

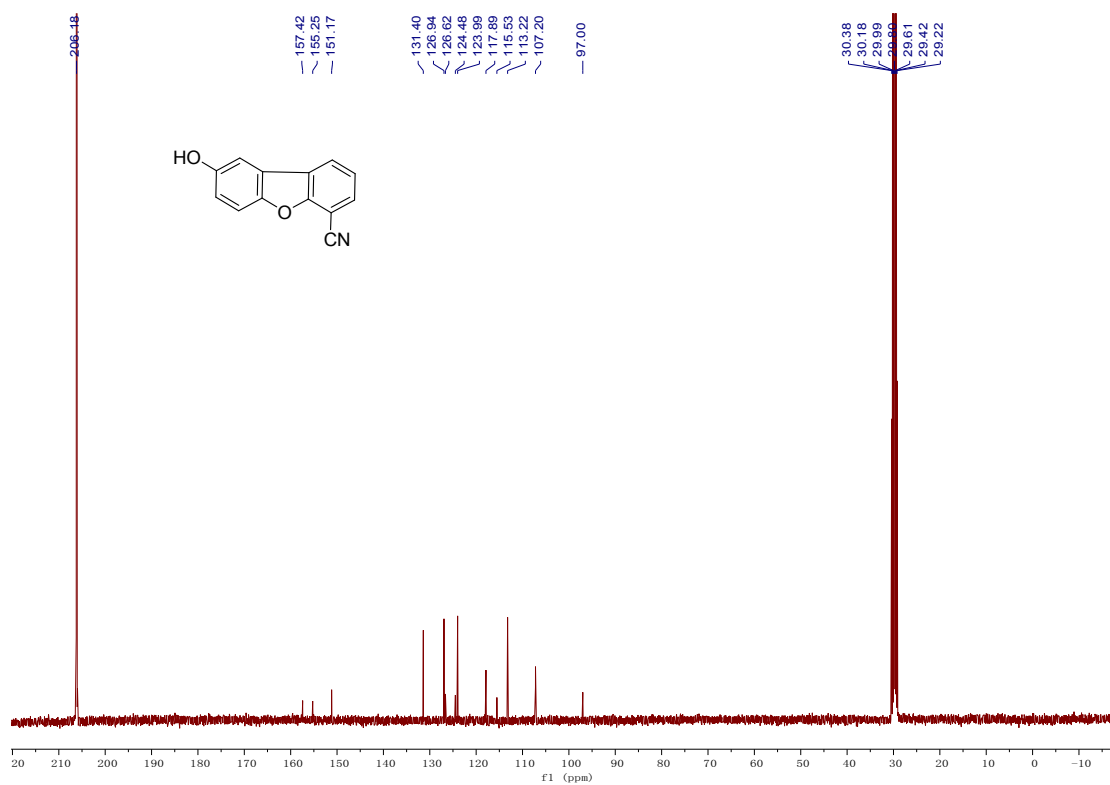

Figure S39. The <sup>13</sup>C NMR spectrum (acetone-*d*<sub>6</sub>, 100 MHz) of intermediate **8**.



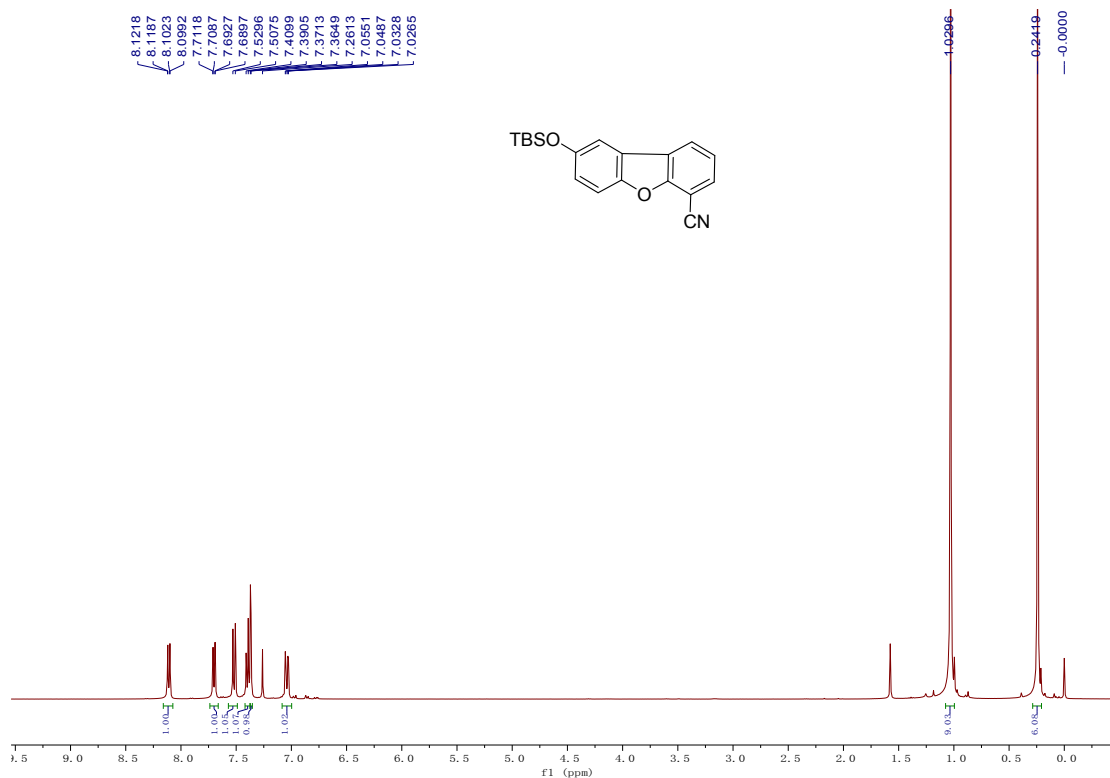

Figure S40. The <sup>1</sup>H NMR spectrum (CDCl<sub>3</sub>, 400 MHz) of synthetic intermediate **9**.

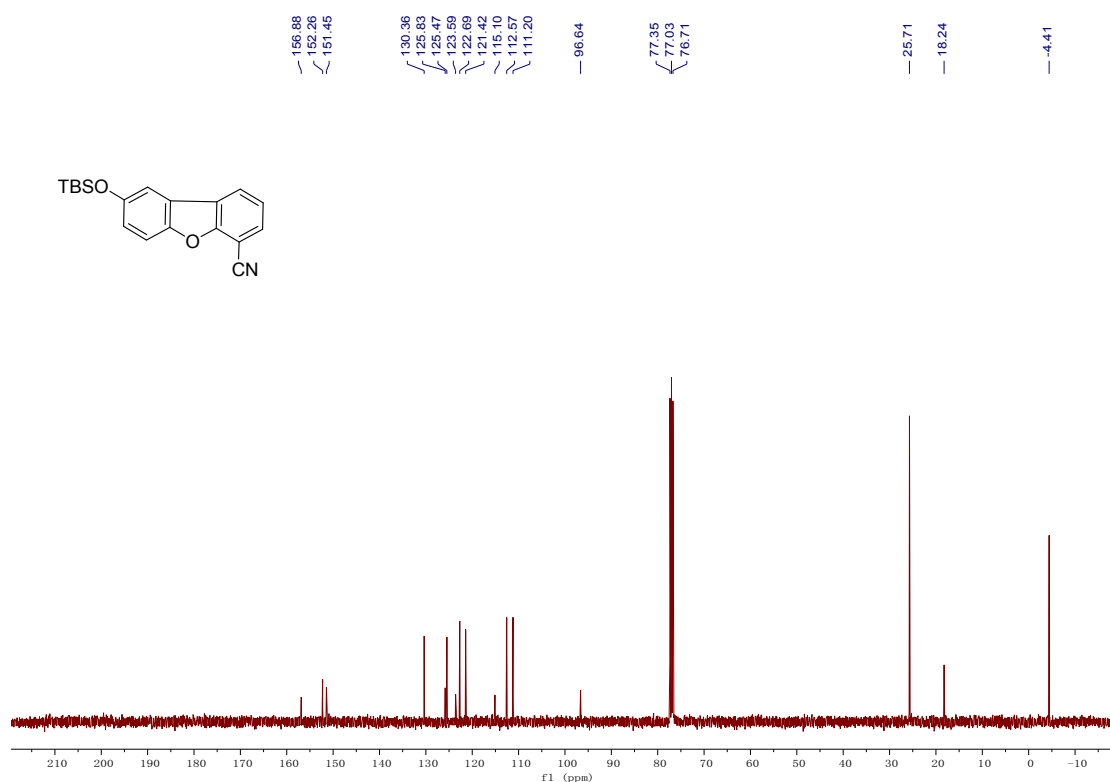

Figure S41. The <sup>13</sup>C NMR spectrum (CDCl<sub>3</sub>, 100 MHz) of synthetic intermediate **9**.

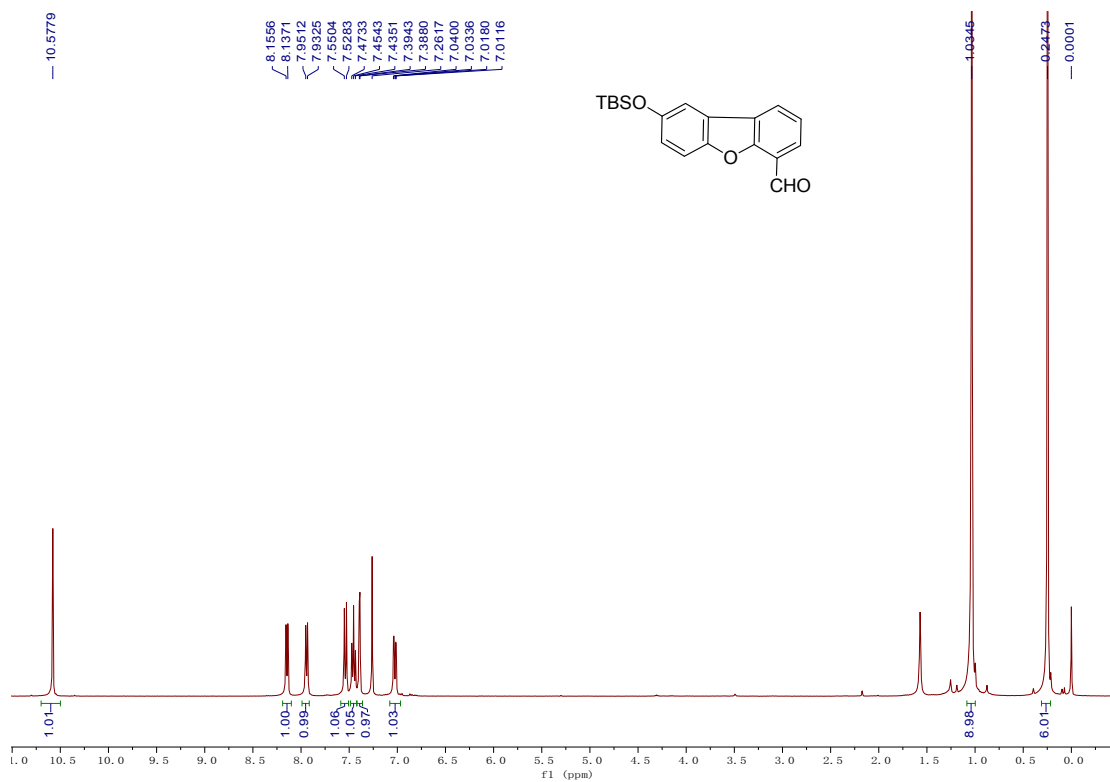

Figure S42. The <sup>1</sup>H NMR spectrum (CDCl<sub>3</sub>, 400 MHz) of synthetic intermediate **5**.

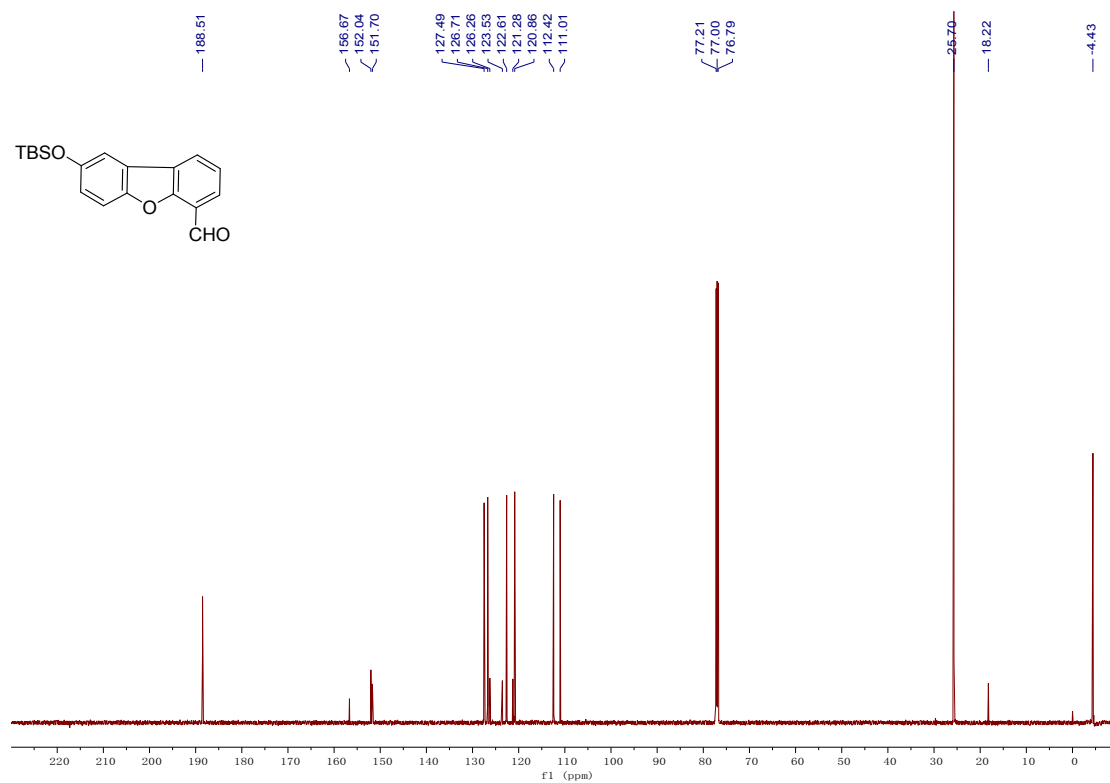

Figure S43. The <sup>13</sup>C NMR spectrum (CDCl<sub>3</sub>, 150 MHz) of synthetic intermediate **5**.

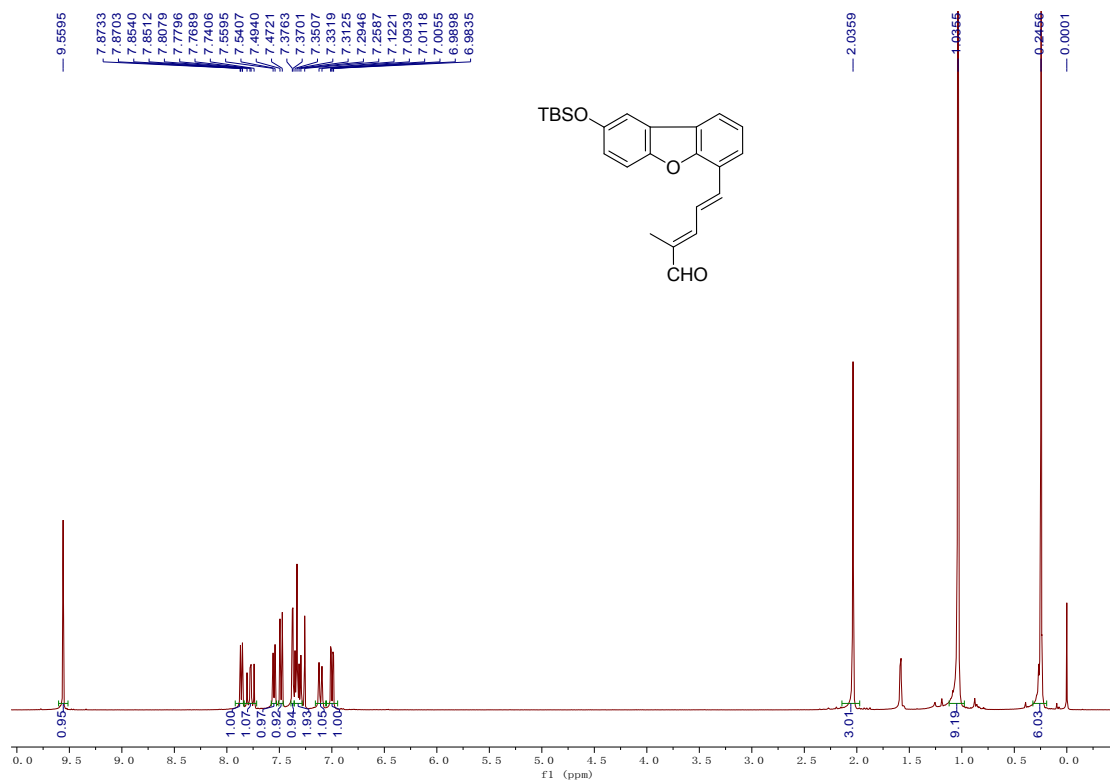

Figure S44. The <sup>1</sup>H NMR spectrum (CDCl<sub>3</sub>, 400 MHz) of synthetic intermediate **10**.

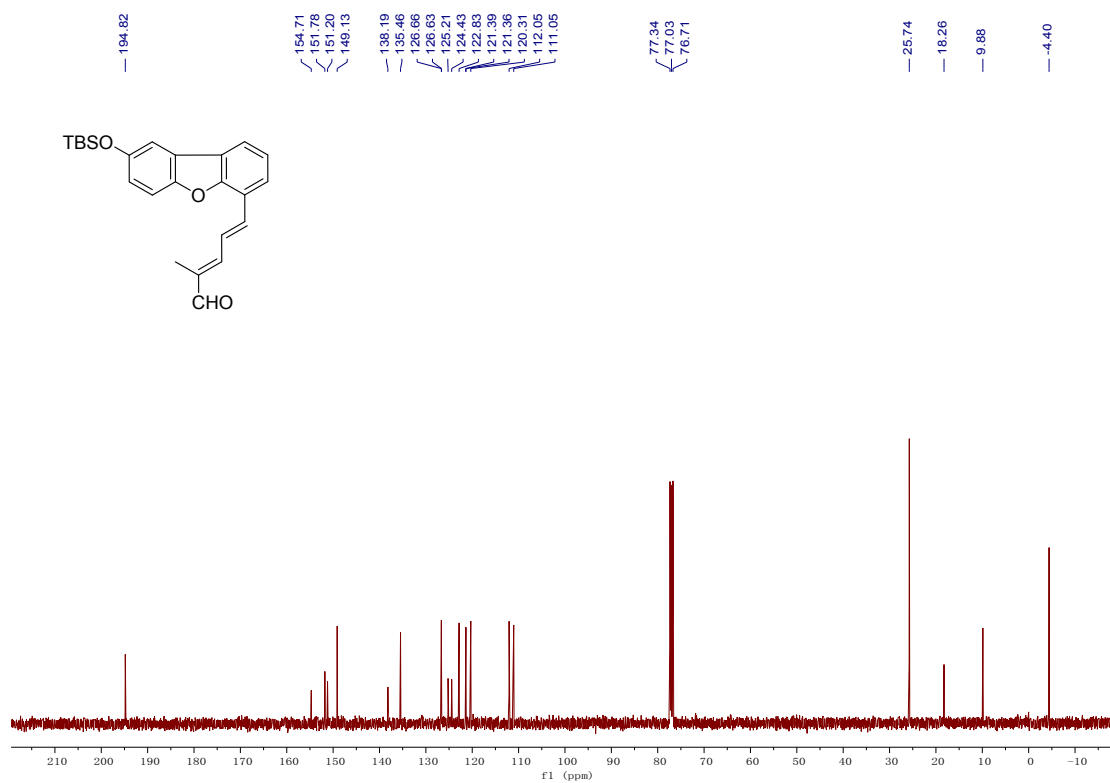

Figure S45. The <sup>13</sup>C NMR spectrum (CDCl<sub>3</sub>, 100 MHz) of synthetic intermediate **10**.

VI. The NMR, HREIMS, and UV spectra of synthetic lingzhifuran A(1).

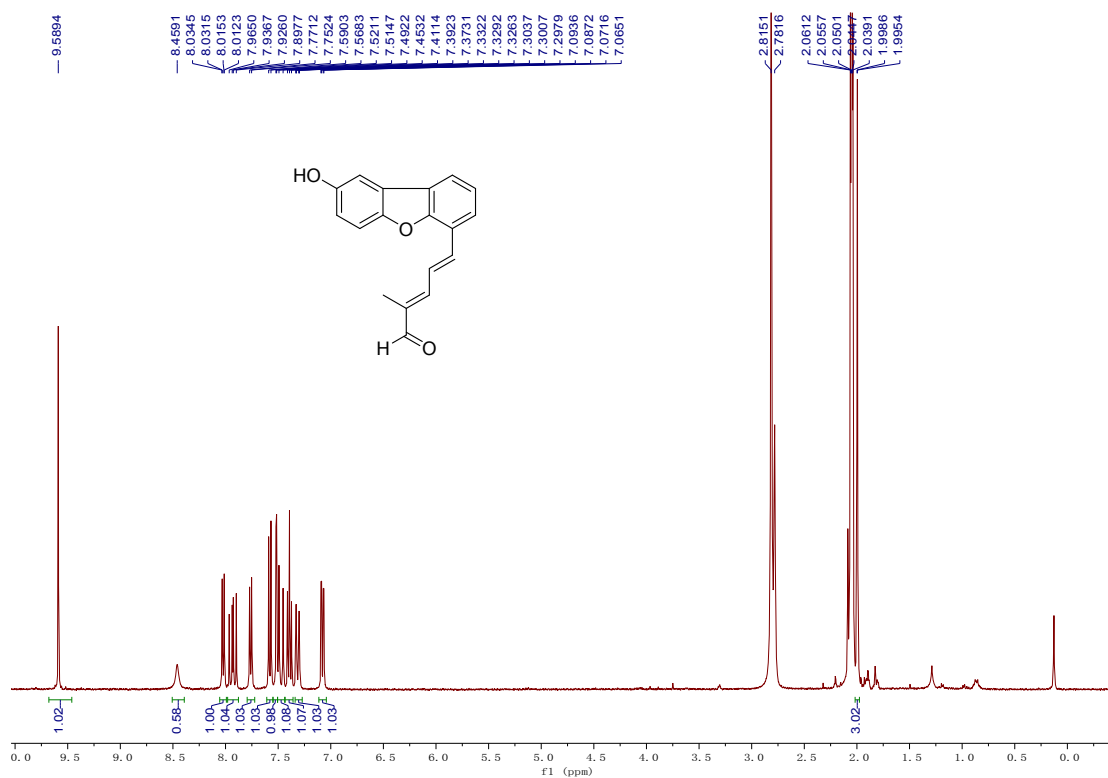

Figure S46. The <sup>1</sup>H NMR spectrum (acetone-*d*<sub>6</sub>, 400 MHz) of synthetic 1.

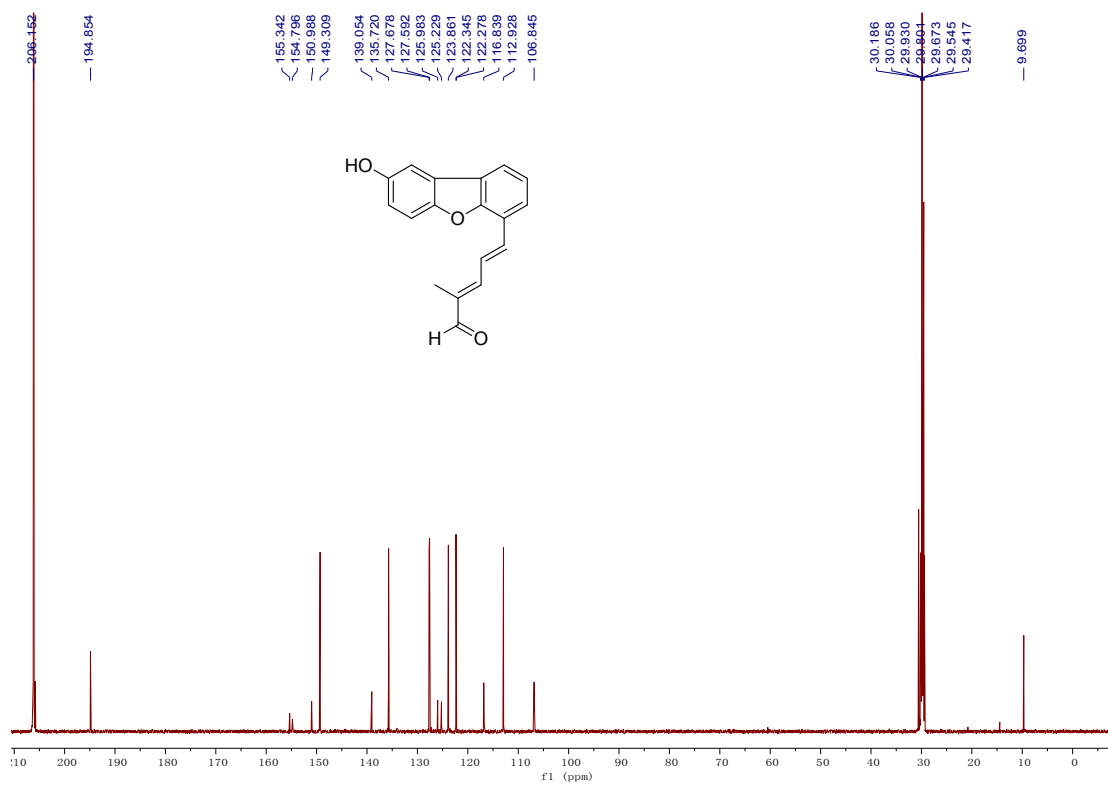

Figure S47. The <sup>13</sup>C NMR spectrum (acetone-*d*<sub>6</sub>, 150 MHz) of synthetic 1.

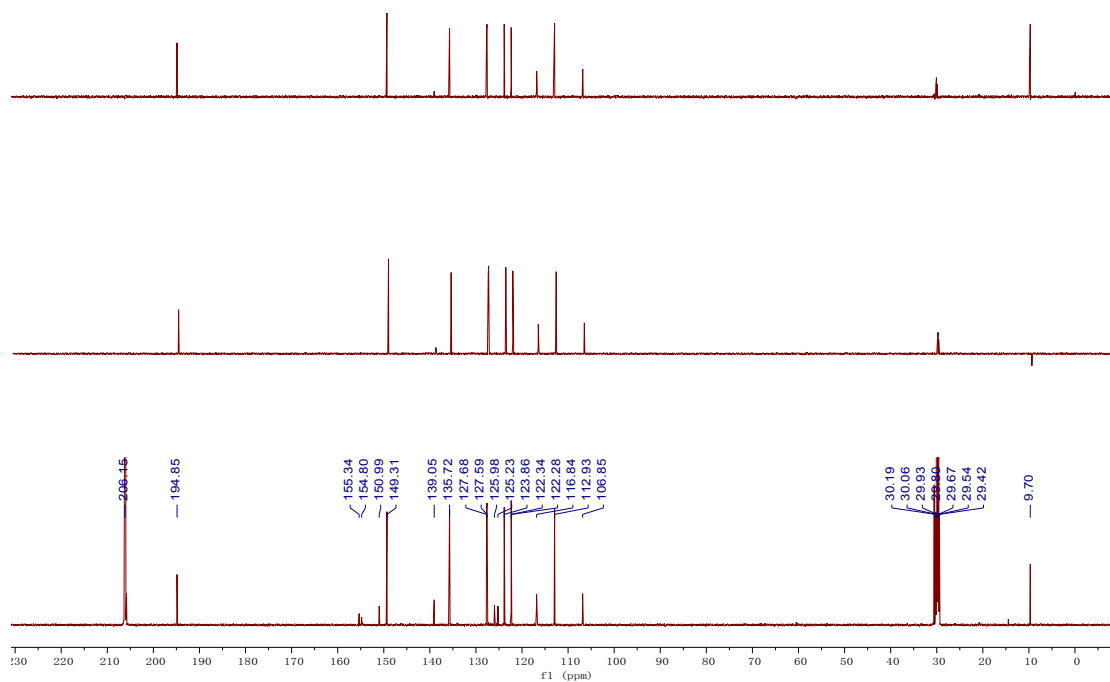

Figure S48. The DEPT spectra (acetone- $d_6$ , 150 MHz) of synthetic **1**.

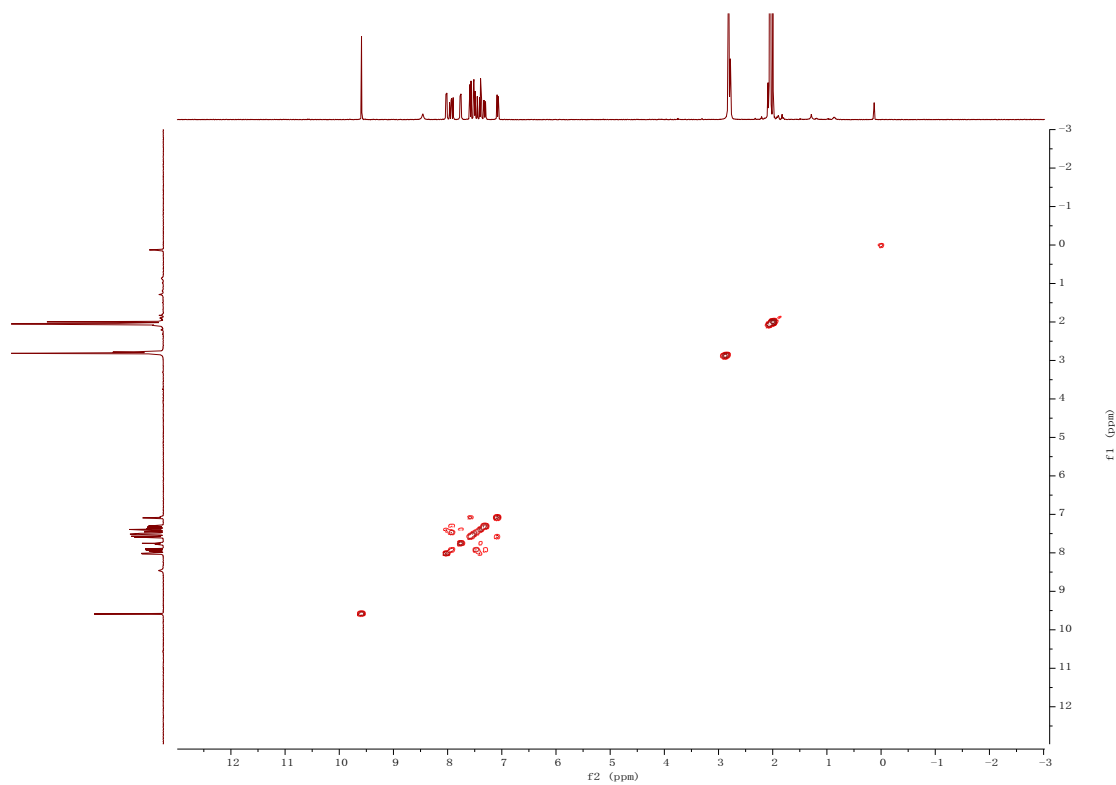

Figure S49. The  $^1\text{H}$ - $^1\text{H}$  COSY spectrum (acetone- $d_6$ , 600 MHz) of synthetic **1**.

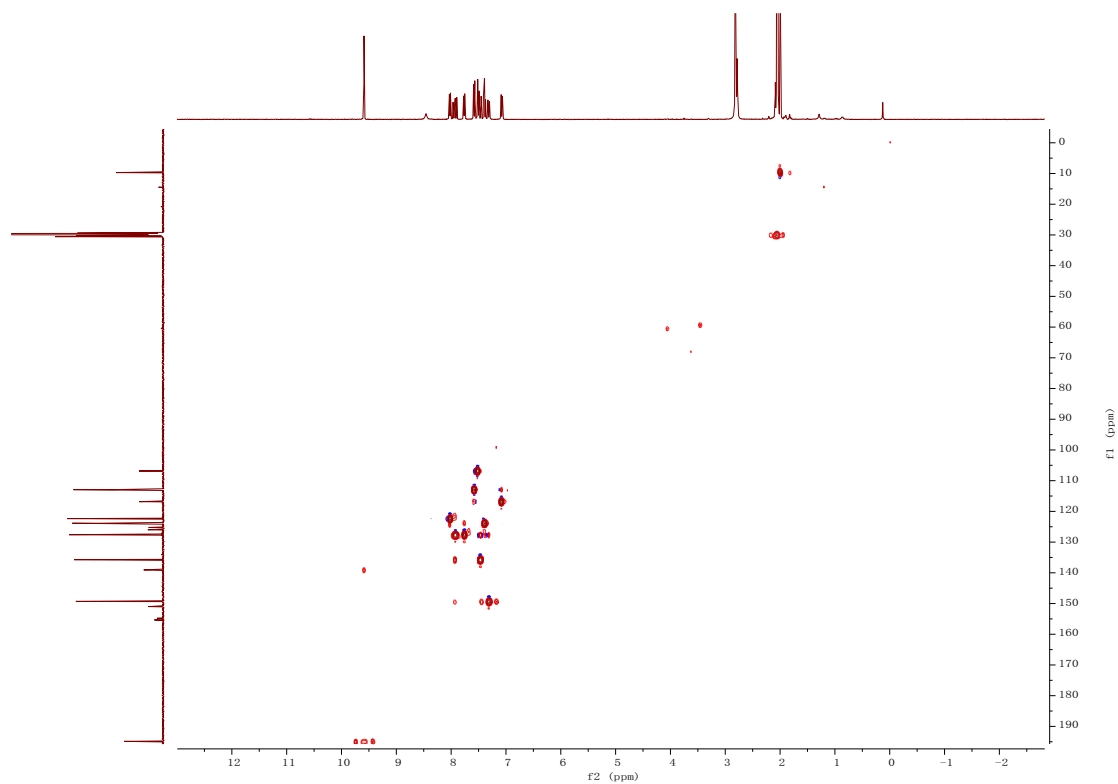

Figure S50. The HSQC spectrum (acetone- $d_6$ , 600 MHz) of synthetic **1**.

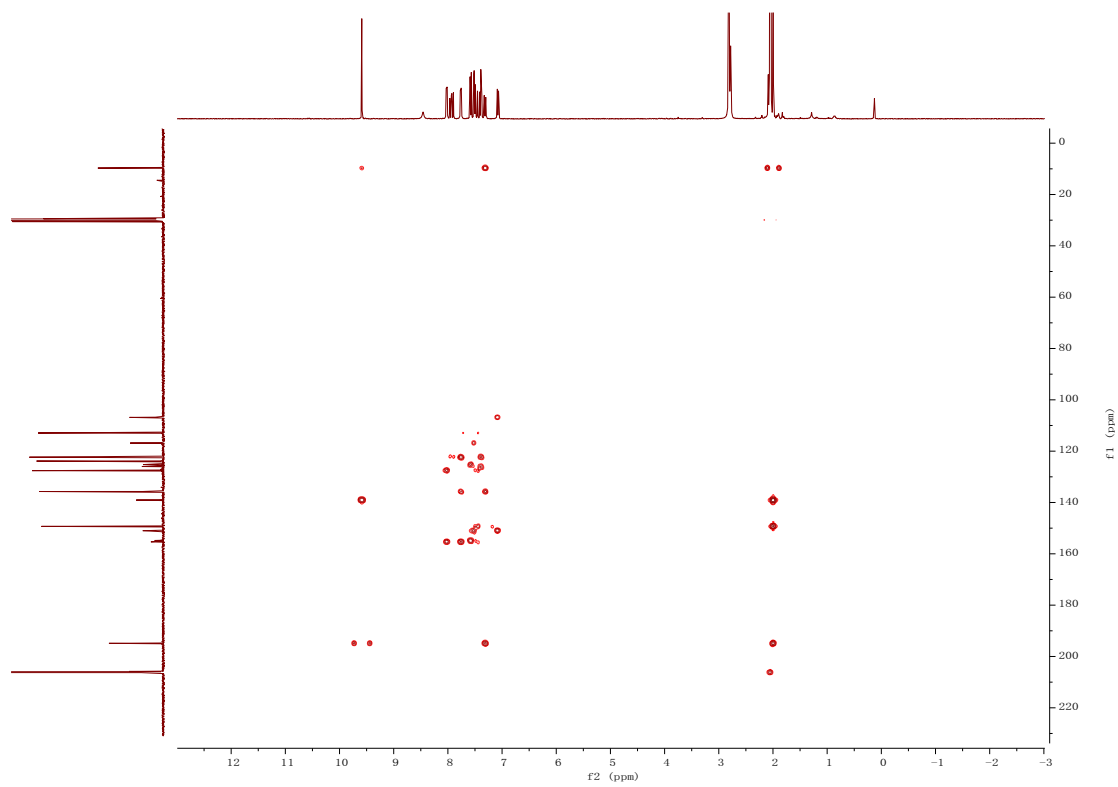

Figure S51. The HMBC spectrum (acetone- $d_6$ , 600 MHz) of synthetic **1**.

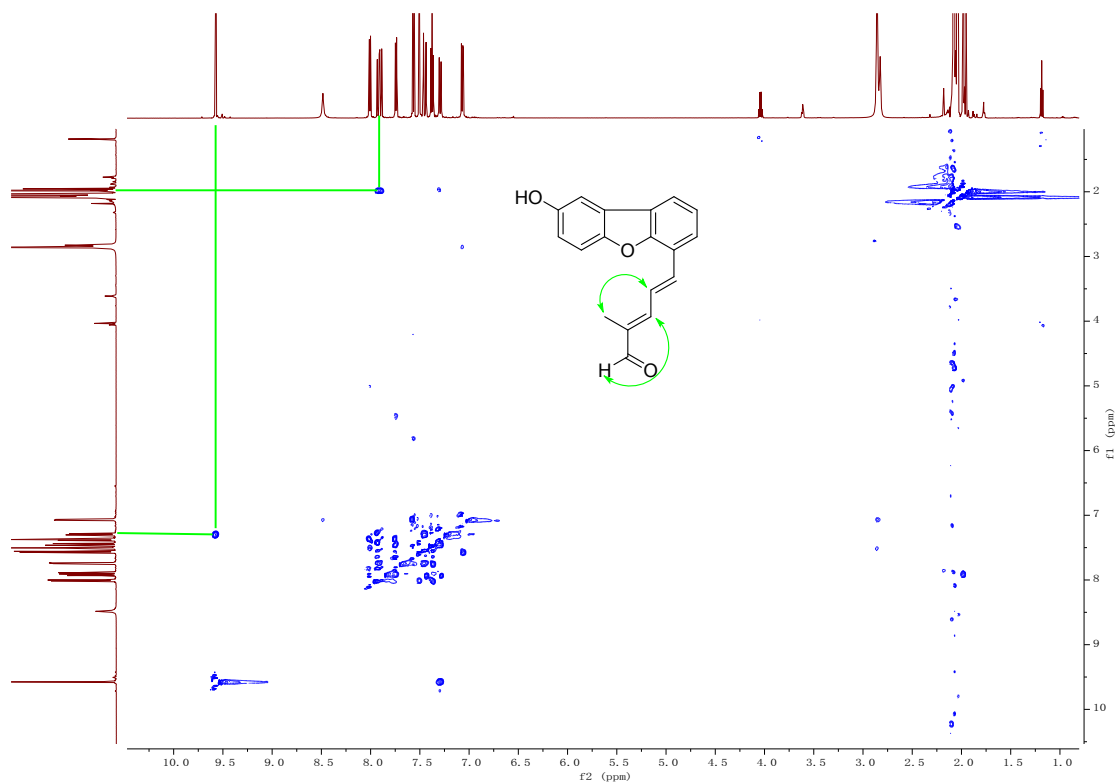

Figure S52. The ROESY spectrum (acetone- $d_6$ , 600 MHz) of synthetic **1**.

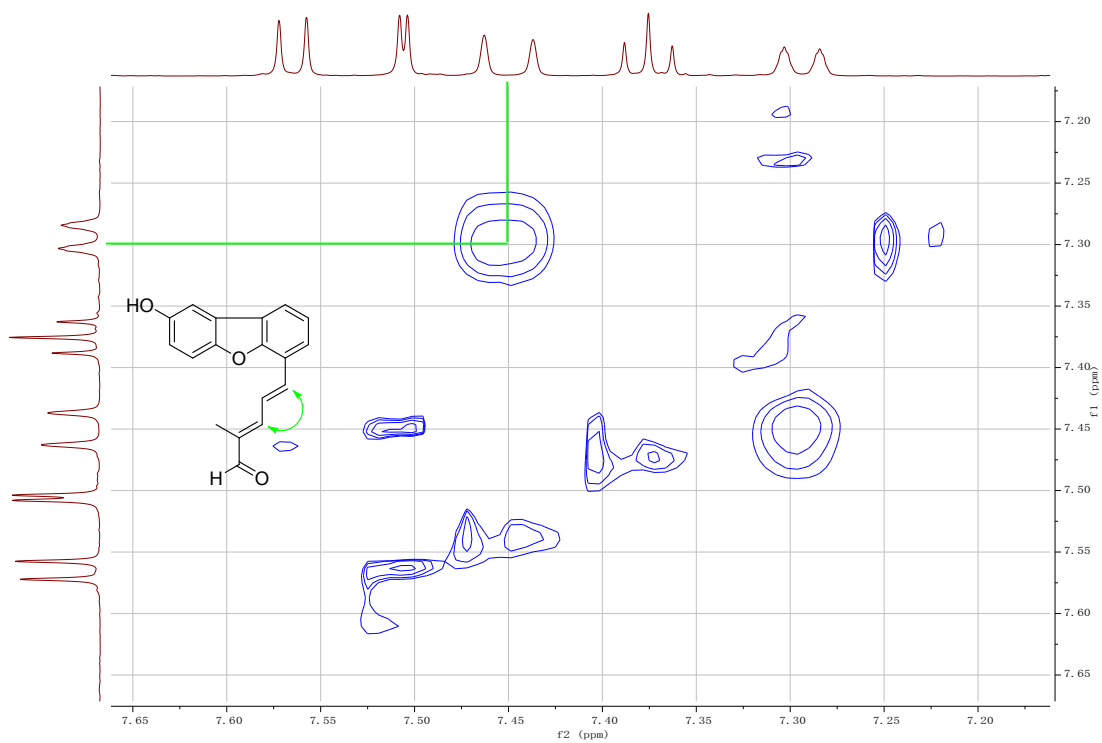

Figure S53. The enlarged ROESY spectrum (acetone- $d_6$ , 600 MHz) of synthetic **1**.

## Qualitative Analysis Report

|                               |                      |                      |                     |
|-------------------------------|----------------------|----------------------|---------------------|
| <b>Data Filename</b>          | 150807ESINA10.d      | <b>Sample Name</b>   | qlz-22              |
| <b>Sample Type</b>            | Sample               | <b>Position</b>      |                     |
| <b>Instrument Name</b>        | Agilent G6230 TOF MS | <b>User Name</b>     | KIB                 |
| <b>Acq Method</b>             | ESIN.m               | <b>Acquired Time</b> | 8/7/2015 3:53:52 PM |
| <b>IRM Calibration Status</b> | Success              | <b>DA Method</b>     | ESI.m               |
| <b>Comment</b>                |                      |                      |                     |

|                               |                                                        |
|-------------------------------|--------------------------------------------------------|
| <b>Sample Group</b>           | <b>Info.</b>                                           |
| <b>Acquisition SW Version</b> | 6200 series TOF/6500 series<br>Q-TOF B.05.01 (B5125.2) |

### User Spectra

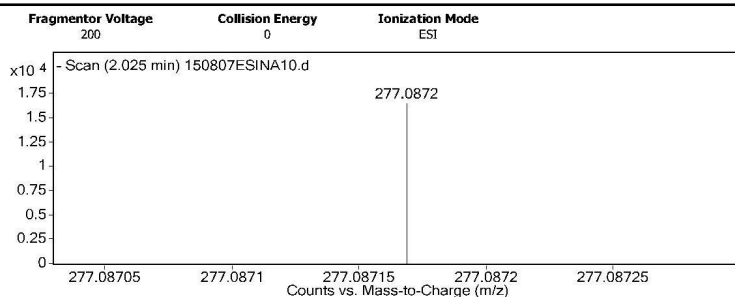

#### Peak List

| <i>m/z</i> | <i>z</i> | Abund    | Formula    | Ion |
|------------|----------|----------|------------|-----|
| 112.9856   |          | 22250.12 |            |     |
| 154.9733   |          | 1103.86  |            |     |
| 277.0872   | 1        | 16477.71 | C18 H13 O3 | M-  |
| 278.0904   | 1        | 1478.03  | C18 H13 O3 | M-  |
| 313.0634   | 1        | 3722.93  |            |     |
| 555.1803   | 1        | 892.39   |            |     |
| 1033.9881  | 1        | 42752.42 |            |     |
| 1034.9894  | 1        | 4595.79  |            |     |
| 1933.9295  | 1        | 6599.81  |            |     |
| 1934.9323  | 1        | 1130.7   |            |     |

#### Formula Calculator Element Limits

| Element | Min | Max |
|---------|-----|-----|
| C       | 0   | 200 |
| H       | 0   | 400 |
| O       | 0   | 6   |

#### Formula Calculator Results

| Formula    | CalculatedMass | CalculatedMz | Mz       | Diff. (mDa) | Diff. (ppm) | DBE     |
|------------|----------------|--------------|----------|-------------|-------------|---------|
| C18 H13 O3 | 277.0865       | 277.0870     | 277.0872 | -0.1        | -0.5        | 12.5000 |

--- End Of Report ---

Figure S54. The HRESIMS (negative) spectrum of synthetic 1.



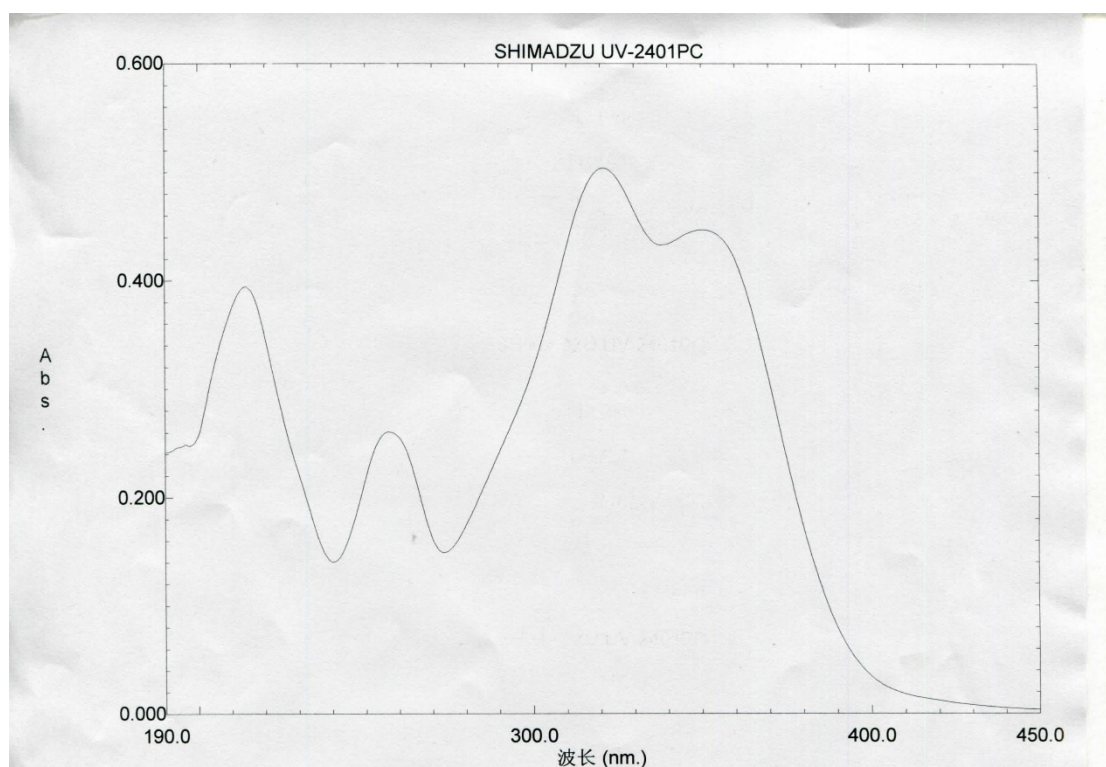

Figure S55. The UV spectrum (MeOH) of synthetic **1**.

## VII Comparison of natural **1** and synthetic **1**.

**Table S1.** <sup>1</sup>H and <sup>13</sup>C NMR data of **1** in acetone-*d*<sub>6</sub> ( $\delta$  in ppm, *J* in Hz).

| <b>1</b> (natural) |                                |                                | <b>1</b> (synthetic) |                                |                                |
|--------------------|--------------------------------|--------------------------------|----------------------|--------------------------------|--------------------------------|
| No.                | $\delta_{\text{H}}^{\text{a}}$ | $\delta_{\text{C}}^{\text{b}}$ | No.                  | $\delta_{\text{H}}^{\text{c}}$ | $\delta_{\text{C}}^{\text{d}}$ |
| 1                  |                                | 154.9 s                        | 1                    |                                | 154.8 s                        |
| 2                  | 7.52 (d, 2.6)                  | 106.9 d                        | 2                    | 7.52 (d, 2.6)                  | 106.8 d                        |
| 3                  |                                | 125.2 s                        | 3                    |                                | 125.2 s                        |
| 4                  |                                | 150.9 s                        | 4                    |                                | 151.0 s                        |
| 5                  | 7.57 (d, 8.8)                  | 112.9 d                        | 5                    | 7.58 (d, 8.8)                  | 112.9 d                        |
| 6                  | 7.08 (dd, 8.8, 2.6)            | 116.9 d                        | 6                    | 7.08 (dd, 8.8, 2.6)            | 116.8 d                        |
| 1'                 |                                | 126.0 s                        | 1'                   |                                | 126.0 s                        |
| 2'                 |                                | 155.3 s                        | 2'                   |                                | 155.3 s                        |
| 3'                 |                                | 122.3 s                        | 3'                   |                                | 122.3 s                        |
| 4'                 | 7.47 (d, 15.6)                 | 135.7 d                        | 4'                   | 7.47 (d, 15.6)                 | 135.7 d                        |
| 5'                 | 7.92 (dd, 15.6, 11.4)          | 127.7 d                        | 5'                   | 7.93 (dd, 15.6, 11.3)          | 127.7 d                        |
| 6'                 | 7.31 (d, 11.4)                 | 149.3 d                        | 6'                   | 7.32 (d, 11.3)                 | 149.3 d                        |
| 7'                 |                                | 139.0 s                        | 7'                   |                                | 139.1 s                        |
| 8'                 | 9.59 (s)                       | 194.9 s                        | 8'                   | 9.59 (s)                       | 194.9 d                        |
| 9'                 | 1.99 (d, 1.2)                  | 9.7 q                          | 9'                   | 2.00 (d, 1.2)                  | 9.7 q                          |
| 10'                | 7.76 (d, 7.6)                  | 127.6 d                        | 10'                  | 7.76 (d, 7.6)                  | 127.6 d                        |
| 11'                | 7.39 (dd, 7.7, 7.7)            | 123.9 d                        | 11'                  | 7.39 (dd, 7.6, 7.6)            | 123.9 d                        |
| 12'                | 8.01 (d, 7.7)                  | 122.3 d                        | 12'                  | 8.02 (dd, 7.6, 1.2)            | 122.3 d                        |
| 1-OH               |                                |                                | 1-OH                 | 8.46 (br)                      |                                |

<sup>a</sup> Recorded at 800 MHz; <sup>b</sup> Recorded at 200 MHz; <sup>c</sup> Recorded at 400 MHz; <sup>d</sup> Recorded at 150 MHz.

HPLC analysis were recorded on a Agilent 1200 spectrometer using Eclipse XDB-C18 column (5  $\mu$ m, 4.6  $\times$  150 mm). HPLC (65% aq. MeOH; flow rate: 1.0 mL/min; 25  $^{\circ}$ C; Detection: 365 nm)

(a) natural **1**

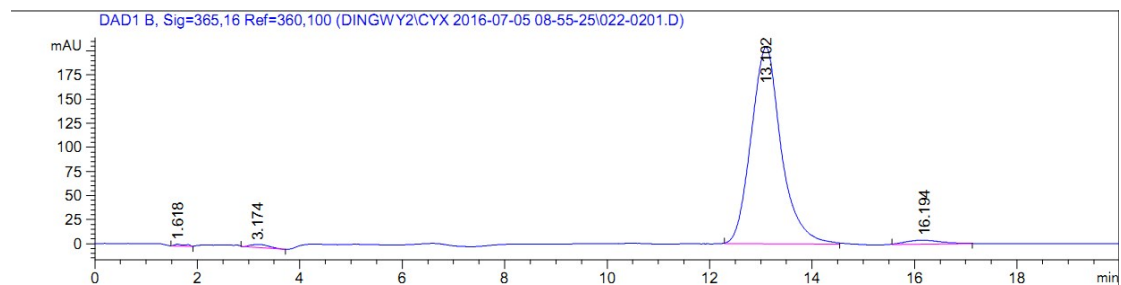

(b) synthetic **1**

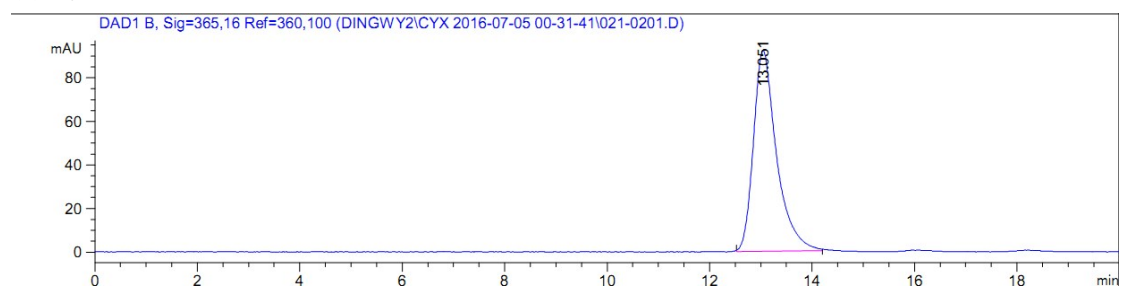

Figure S56. HPLC chromatograms of natural and synthetic of **1**.

### VIII. X-ray data of (-)-2.

Crystal data for cu\_qylz2b\_0m:  $C_{17}H_{16}O_8$ ,  $M = 348.30$ , monoclinic,  $a = 6.7105(3)$  Å,  $b = 7.8030(4)$  Å,  $c = 15.2397(9)$  Å,  $\alpha = 90.00^\circ$ ,  $\beta = 102.694(2)^\circ$ ,  $\gamma = 90.00^\circ$ ,  $V = 778.48(7)$  Å<sup>3</sup>,  $T = 100(2)$  K, space group  $P21$ ,  $Z = 2$ ,  $\mu(\text{CuK}\alpha) = 1.020$  mm<sup>-1</sup>, 5682 reflections measured, 2079 independent reflections ( $R_{int} = 0.0482$ ). The final  $R_I$  values were 0.1075 ( $I > 2\sigma(I)$ ). The final  $wR(F^2)$  values were 0.2890 ( $I > 2\sigma(I)$ ). The final  $R_I$  values were 0.1080 (all data). The final  $wR(F^2)$  values were 0.2892 (all data). The goodness of fit on  $F^2$  was 1.212. Flack parameter = -0.2(8). The deposition number CCDC 1491784 for (-)-2 can be obtained free of charge from The Cambridge Crystallographic Data Centre via [www.ccdc.cam.ac.uk/data\\_request/cif](http://www.ccdc.cam.ac.uk/data_request/cif).

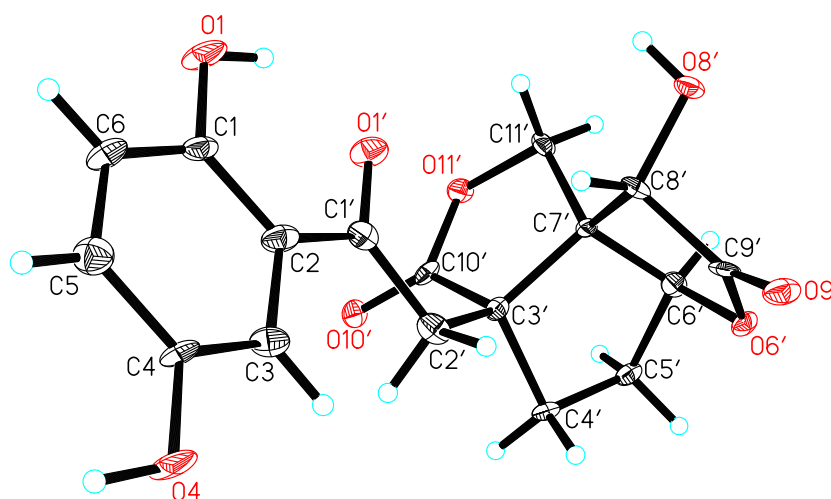

View of a molecule of qylz2b with the atom-labelling scheme.

Displacement ellipsoids are drawn at the 30% probability level.

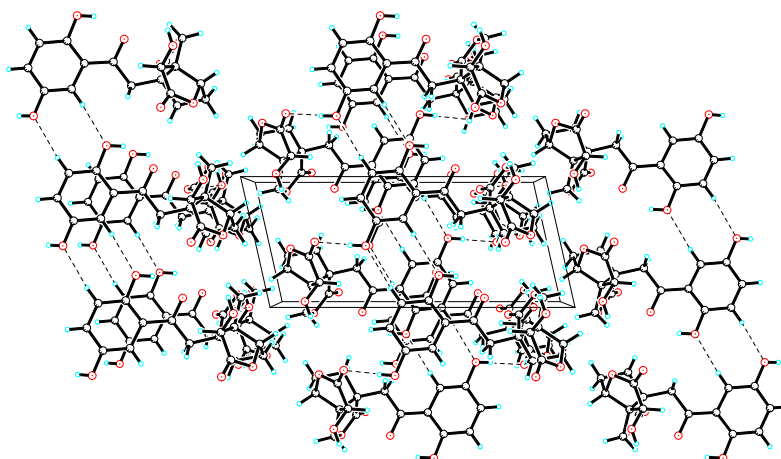

View of the hydrogen-bonded motif of qylz2b.

Hydrogen-bonds are shown as dashed lines.

Table 1. Crystal data and structure refinement for qylz2b.

|                             |                                                                                                                        |
|-----------------------------|------------------------------------------------------------------------------------------------------------------------|
| Identification code         | qylz2b                                                                                                                 |
| Empirical formula           | C <sub>17</sub> H <sub>16</sub> O <sub>8</sub>                                                                         |
| Formula weight              | 348.30                                                                                                                 |
| Temperature                 | 100(2) K                                                                                                               |
| Wavelength                  | 1.54178 Å                                                                                                              |
| Crystal system, space group | Monoclinic, P 21                                                                                                       |
| Unit cell dimensions        | a = 6.7105(3) Å    alpha = 90 deg.<br>b = 7.8030(4) Å    beta = 102.694(2) deg.<br>c = 15.2397(9) Å    gamma = 90 deg. |
| Volume                      | 778.48(7) Å <sup>3</sup>                                                                                               |
| Z, Calculated density       | 2, 1.486 Mg/m <sup>3</sup>                                                                                             |
| Absorption coefficient      | 1.020 mm <sup>-1</sup>                                                                                                 |
| F(000)                      | 364                                                                                                                    |

|                                   |                                             |
|-----------------------------------|---------------------------------------------|
| Crystal size                      | 0.32 x 0.16 x 0.12 mm                       |
| Theta range for data collection   | 2.97 to 68.81 deg.                          |
| Limiting indices                  | -7<=h<=7, -7<=k<=9, -18<=l<=18              |
| Reflections collected / unique    | 5682 / 2079 [R(int) = 0.0482]               |
| Completeness to theta = 68.81     | 97.4 %                                      |
| Absorption correction             | Semi-empirical from equivalents             |
| Max. and min. transmission        | 0.8874 and 0.7361                           |
| Refinement method                 | Full-matrix least-squares on F <sup>2</sup> |
| Data / restraints / parameters    | 2079 / 7 / 228                              |
| Goodness-of-fit on F <sup>2</sup> | 1.212                                       |
| Final R indices [I>2sigma(I)]     | R1 = 0.1075, wR2 = 0.2890                   |
| R indices (all data)              | R1 = 0.1080, wR2 = 0.2892                   |
| Absolute structure parameter      | -0.2(8)                                     |
| Largest diff. peak and hole       | 0.588 and -0.622 e.A <sup>-3</sup>          |

Table 2. Atomic coordinates ( $\times 10^4$ ) and equivalent isotropic displacement parameters ( $\text{\AA}^2 \times 10^3$ ) for qylz2b.

U(eq) is defined as one third of the trace of the orthogonalized Uij tensor.

|        | x         | y        | z       | U(eq) |
|--------|-----------|----------|---------|-------|
| O(9')  | 5006(10)  | 8089(10) | 1892(5) | 27(2) |
| O(4)   | 5291(10)  | 4260(15) | 6418(4) | 40(3) |
| O(1')  | -672(11)  | 3946(11) | 2877(5) | 29(2) |
| O(11') | -860(10)  | 2304(10) | 1127(4) | 21(2) |
| O(6')  | 4460(10)  | 5879(10) | 954(4)  | 19(2) |
| O(8')  | 345(10)   | 7526(9)  | 1098(4) | 21(2) |
| O(10') | 795(10)   | 410(9)   | 2117(5) | 22(2) |
| O(1)   | -2422(10) | 4344(14) | 4222(5) | 37(2) |
| C(5)   | 1610(17)  | 4419(17) | 6226(7) | 31(3) |
| C(4)   | 3368(14)  | 4257(16) | 5879(7) | 25(2) |
| C(3)   | 3196(15)  | 4101(16) | 4978(7) | 25(2) |
| C(2)   | 1225(15)  | 4122(15) | 4362(7) | 25(2) |
| C(1')  | 1075(15)  | 3889(13) | 3407(7) | 23(2) |
| C(2')  | 2878(16)  | 3530(14) | 3020(6) | 24(2) |
| C(3')  | 2365(14)  | 3176(13) | 2009(6) | 16(2) |
| C(7')  | 1531(13)  | 4659(14) | 1344(6) | 17(2) |
| C(8')  | 1810(16)  | 6459(13) | 1697(7) | 20(2) |
| C(9')  | 3861(14)  | 6929(13) | 1553(6) | 20(2) |
| C(10') | 734(15)   | 1816(13) | 1797(6) | 18(2) |
| C(11') | -719(14)  | 4143(14) | 936(6)  | 20(2) |
| C(6')  | 2835(14)  | 4589(14) | 636(6)  | 19(2) |
| C(5')  | 3855(14)  | 2828(14) | 693(6)  | 20(2) |
| C(4')  | 4312(13)  | 2483(13) | 1714(6) | 16(2) |
| C(1)   | -490(14)  | 4317(15) | 4745(7) | 25(2) |
| C(6)   | -288(15)  | 4440(17) | 5663(7) | 28(3) |

Table 3. Bond lengths [Å] and angles [deg] for qylz2b.

---

|               |           |
|---------------|-----------|
| O(9')-C(9')   | 1.226(13) |
| O(4)-C(4)     | 1.369(11) |
| O(4)-H(4)     | 0.8400    |
| O(1')-C(1')   | 1.270(12) |
| O(11')-C(10') | 1.361(12) |
| O(11')-C(11') | 1.471(13) |
| O(6')-C(9')   | 1.351(12) |
| O(6')-C(6')   | 1.485(11) |
| O(8')-C(8')   | 1.449(11) |
| O(8')-H(8')   | 0.8400    |
| O(10')-C(10') | 1.197(13) |
| O(1)-C(1)     | 1.365(12) |
| O(1)-H(1)     | 0.8400    |
| C(5)-C(6)     | 1.370(15) |
| C(5)-C(4)     | 1.401(13) |
| C(5)-H(5)     | 0.9500    |
| C(4)-C(3)     | 1.358(15) |
| C(3)-C(2)     | 1.444(13) |
| C(3)-H(3)     | 0.9500    |
| C(2)-C(1)     | 1.408(13) |
| C(2)-C(1')    | 1.448(15) |
| C(1')-C(2')   | 1.485(14) |
| C(2')-C(3')   | 1.528(12) |
| C(2')-H(2'1)  | 0.9900    |
| C(2')-H(2'2)  | 0.9900    |
| C(3')-C(10')  | 1.508(13) |
| C(3')-C(7')   | 1.559(14) |
| C(3')-C(4')   | 1.568(12) |
| C(7')-C(8')   | 1.500(15) |
| C(7')-C(6')   | 1.532(12) |
| C(7')-C(11')  | 1.555(12) |
| C(8')-C(9')   | 1.486(14) |
| C(8')-H(8'1)  | 1.0000    |
| C(11')-H(11A) | 0.9900    |
| C(11')-H(11B) | 0.9900    |
| C(6')-C(5')   | 1.529(15) |
| C(6')-H(6')   | 1.0000    |
| C(5')-C(4')   | 1.543(13) |
| C(5')-H(5'1)  | 0.9900    |
| C(5')-H(5'2)  | 0.9900    |



|              |           |
|--------------|-----------|
| C(4')-H(4'1) | 0.9900    |
| C(4')-H(4'2) | 0.9900    |
| C(1)-C(6)    | 1.379(15) |
| C(6)-H(6)    | 0.9500    |

|                      |           |
|----------------------|-----------|
| C(4)-O(4)-H(4)       | 109.5     |
| C(10')-O(11')-C(11') | 110.3(7)  |
| C(9')-O(6')-C(6')    | 109.0(7)  |
| C(8')-O(8')-H(8')    | 109.5     |
| C(1)-O(1)-H(1)       | 109.5     |
| C(6)-C(5)-C(4)       | 120.6(10) |
| C(6)-C(5)-H(5)       | 119.7     |
| C(4)-C(5)-H(5)       | 119.7     |
| C(3)-C(4)-O(4)       | 117.8(8)  |
| C(3)-C(4)-C(5)       | 119.9(10) |
| O(4)-C(4)-C(5)       | 122.3(9)  |
| C(4)-C(3)-C(2)       | 121.2(9)  |
| C(4)-C(3)-H(3)       | 119.4     |
| C(2)-C(3)-H(3)       | 119.4     |
| C(1)-C(2)-C(3)       | 116.6(9)  |
| C(1)-C(2)-C(1')      | 123.2(9)  |
| C(3)-C(2)-C(1')      | 120.2(9)  |
| O(1')-C(1')-C(2)     | 119.1(9)  |
| O(1')-C(1')-C(2')    | 118.2(9)  |
| C(2)-C(1')-C(2')     | 122.7(8)  |
| C(1')-C(2')-C(3')    | 114.4(8)  |
| C(1')-C(2')-H(2'1)   | 108.7     |
| C(3')-C(2')-H(2'1)   | 108.7     |
| C(1')-C(2')-H(2'2)   | 108.7     |
| C(3')-C(2')-H(2'2)   | 108.7     |
| H(2'1)-C(2')-H(2'2)  | 107.6     |
| C(10')-C(3')-C(2')   | 109.6(8)  |
| C(10')-C(3')-C(7')   | 104.1(8)  |
| C(2')-C(3')-C(7')    | 119.3(9)  |
| C(10')-C(3')-C(4')   | 107.9(8)  |
| C(2')-C(3')-C(4')    | 109.5(8)  |
| C(7')-C(3')-C(4')    | 105.9(7)  |
| C(8')-C(7')-C(6')    | 103.9(8)  |
| C(8')-C(7')-C(11')   | 114.8(8)  |
| C(6')-C(7')-C(11')   | 111.3(8)  |
| C(8')-C(7')-C(3')    | 117.6(8)  |
| C(6')-C(7')-C(3')    | 104.6(7)  |
| C(11')-C(7')-C(3')   | 104.3(7)  |
| O(8')-C(8')-C(9')    | 106.7(8)  |

|                      |           |
|----------------------|-----------|
| O(8')-C(8')-C(7')    | 107.4(8)  |
| C(9')-C(8')-C(7')    | 103.0(8)  |
| O(8')-C(8')-H(8'1)   | 113.0     |
| C(9')-C(8')-H(8'1)   | 113.0     |
| C(7')-C(8')-H(8'1)   | 113.0     |
| O(9')-C(9')-O(6')    | 118.7(9)  |
| O(9')-C(9')-C(8')    | 129.4(9)  |
| O(6')-C(9')-C(8')    | 111.9(9)  |
| O(10')-C(10')-O(11') | 120.8(9)  |
| O(10')-C(10')-C(3')  | 126.8(9)  |
| O(11')-C(10')-C(3')  | 112.2(8)  |
| O(11')-C(11')-C(7')  | 105.8(8)  |
| O(11')-C(11')-H(11A) | 110.6     |
| C(7')-C(11')-H(11A)  | 110.6     |
| O(11')-C(11')-H(11B) | 110.6     |
| C(7')-C(11')-H(11B)  | 110.6     |
| H(11A)-C(11')-H(11B) | 108.7     |
| O(6')-C(6')-C(5')    | 107.6(7)  |
| O(6')-C(6')-C(7')    | 103.8(7)  |
| C(5')-C(6')-C(7')    | 108.1(8)  |
| O(6')-C(6')-H(6')    | 112.3     |
| C(5')-C(6')-H(6')    | 112.3     |
| C(7')-C(6')-H(6')    | 112.3     |
| C(6')-C(5')-C(4')    | 101.6(8)  |
| C(6')-C(5')-H(5'1)   | 111.5     |
| C(4')-C(5')-H(5'1)   | 111.5     |
| C(6')-C(5')-H(5'2)   | 111.5     |
| C(4')-C(5')-H(5'2)   | 111.5     |
| H(5'1)-C(5')-H(5'2)  | 109.3     |
| C(5')-C(4')-C(3')    | 103.6(7)  |
| C(5')-C(4')-H(4'1)   | 111.0     |
| C(3')-C(4')-H(4'1)   | 111.0     |
| C(5')-C(4')-H(4'2)   | 111.0     |
| C(3')-C(4')-H(4'2)   | 111.0     |
| H(4'1)-C(4')-H(4'2)  | 109.0     |
| O(1)-C(1)-C(6)       | 117.4(9)  |
| O(1)-C(1)-C(2)       | 121.2(10) |
| C(6)-C(1)-C(2)       | 121.4(9)  |
| C(5)-C(6)-C(1)       | 120.3(9)  |
| C(5)-C(6)-H(6)       | 119.8     |
| C(1)-C(6)-H(6)       | 119.8     |

---

Symmetry transformations used to generate equivalent atoms:

Table 4. Anisotropic displacement parameters ( $\text{\AA}^2 \times 10^3$ ) for qylz2b.

The anisotropic displacement factor exponent takes the form:

$$-2 \pi^2 [ h^2 a^{*2} U_{11} + \dots + 2 h k a^* b^* U_{12} ]$$

|        | U11   | U22   | U33   | U23   | U13   | U12   |
|--------|-------|-------|-------|-------|-------|-------|
| O(9')  | 16(3) | 19(4) | 44(4) | -5(3) | 2(3)  | 0(3)  |
| O(4)   | 7(3)  | 93(8) | 18(3) | -4(4) | -2(2) | 5(4)  |
| O(1')  | 20(4) | 40(5) | 25(3) | -7(3) | -1(3) | 0(4)  |
| O(11') | 16(3) | 17(4) | 27(3) | 0(3)  | 2(3)  | -3(3) |
| O(6')  | 12(3) | 18(4) | 27(3) | -2(3) | 4(3)  | -5(3) |
| O(8')  | 16(3) | 19(4) | 24(3) | 4(3)  | -2(3) | 4(3)  |
| O(10') | 23(3) | 13(4) | 30(4) | 0(3)  | 7(3)  | -5(3) |
| O(1)   | 10(3) | 68(7) | 30(4) | -8(5) | 0(3)  | 6(4)  |
| C(5)   | 31(6) | 31(7) | 30(5) | -3(5) | 7(4)  | 3(5)  |
| C(4)   | 7(4)  | 34(7) | 34(5) | -3(5) | 5(4)  | -2(5) |
| C(3)   | 17(5) | 31(6) | 24(5) | -5(5) | -4(4) | -1(5) |
| C(2)   | 15(5) | 23(6) | 37(5) | -4(5) | 3(4)  | -1(5) |
| C(1')  | 15(4) | 16(6) | 33(5) | 4(4)  | -5(4) | -8(4) |
| C(2')  | 25(5) | 22(6) | 21(5) | -3(4) | -5(4) | -3(4) |
| C(3')  | 14(4) | 16(5) | 20(4) | -1(4) | 6(3)  | -1(4) |
| C(7')  | 9(4)  | 15(5) | 26(5) | 6(4)  | 4(3)  | 0(4)  |
| C(8')  | 21(5) | 14(5) | 22(5) | 4(4)  | 0(4)  | 7(4)  |
| C(9')  | 14(5) | 21(6) | 24(5) | 4(4)  | 1(4)  | 11(4) |
| C(10') | 15(5) | 20(6) | 23(5) | -6(4) | 11(4) | -2(4) |
| C(11') | 21(5) | 12(5) | 26(5) | 6(4)  | 3(4)  | 1(4)  |
| C(6')  | 18(2) | 18(3) | 20(2) | 0(2)  | 1(2)  | -2(2) |
| C(5')  | 13(4) | 22(6) | 26(5) | -4(4) | 6(4)  | -2(4) |
| C(4')  | 9(4)  | 16(5) | 22(4) | -6(4) | 2(3)  | 1(4)  |
| C(1)   | 12(4) | 18(6) | 46(6) | 3(5)  | 6(4)  | 0(4)  |
| C(6)   | 13(4) | 37(7) | 37(6) | -7(5) | 7(4)  | -4(5) |

Table 5. Hydrogen coordinates ( $\times 10^4$ ) and isotropic displacement parameters ( $\text{\AA}^2 \times 10^3$ ) for qylz2b.

---

|        | x     | y    | z    | U(eq) |
|--------|-------|------|------|-------|
| H(4)   | 5246  | 3867 | 6926 | 60    |
| H(8')  | -839  | 7293 | 1159 | 31    |
| H(1)   | -2365 | 4403 | 3678 | 55    |
| H(5)   | 1734  | 4514 | 6857 | 37    |
| H(3)   | 4394  | 3975 | 4748 | 31    |
| H(2'1) | 3611  | 2525 | 3332 | 29    |
| H(2'2) | 3817  | 4523 | 3139 | 29    |
| H(8'1) | 1709  | 6555 | 2340 | 24    |
| H(11A) | -1669 | 4809 | 1217 | 24    |
| H(11B) | -1063 | 4354 | 279  | 24    |
| H(6')  | 2023  | 4848 | 18   | 23    |
| H(5'1) | 5125  | 2863 | 463  | 24    |
| H(5'2) | 2922  | 1954 | 355  | 24    |
| H(4'1) | 5552  | 3103 | 2026 | 19    |
| H(4'2) | 4501  | 1242 | 1843 | 19    |
| H(6)   | -1471 | 4540 | 5907 | 34    |

---

Table 6. Torsion angles [deg] for qylz2b.

---

|                             |            |
|-----------------------------|------------|
| C(6)-C(5)-C(4)-C(3)         | -1(2)      |
| C(6)-C(5)-C(4)-O(4)         | 178.9(12)  |
| O(4)-C(4)-C(3)-C(2)         | -178.7(12) |
| C(5)-C(4)-C(3)-C(2)         | 0.9(19)    |
| C(4)-C(3)-C(2)-C(1)         | 0.2(18)    |
| C(4)-C(3)-C(2)-C(1')        | -177.7(11) |
| C(1)-C(2)-C(1')-O(1')       | 3.6(17)    |
| C(3)-C(2)-C(1')-O(1')       | -178.7(11) |
| C(1)-C(2)-C(1')-C(2')       | -174.4(11) |
| C(3)-C(2)-C(1')-C(2')       | 3.3(16)    |
| O(1')-C(1')-C(2')-C(3')     | -3.0(14)   |
| C(2)-C(1')-C(2')-C(3')      | 175.0(10)  |
| C(1')-C(2')-C(3')-C(10')    | -51.3(12)  |
| C(1')-C(2')-C(3')-C(7')     | 68.4(12)   |
| C(1')-C(2')-C(3')-C(4')     | -169.5(9)  |
| C(10')-C(3')-C(7')-C(8')    | 139.2(8)   |
| C(2')-C(3')-C(7')-C(8')     | 16.7(12)   |
| C(4')-C(3')-C(7')-C(8')     | -107.2(9)  |
| C(10')-C(3')-C(7')-C(6')    | -106.3(8)  |
| C(2')-C(3')-C(7')-C(6')     | 131.2(9)   |
| C(4')-C(3')-C(7')-C(6')     | 7.3(10)    |
| C(10')-C(3')-C(7')-C(11')   | 10.7(9)    |
| C(2')-C(3')-C(7')-C(11')    | -111.8(9)  |
| C(4')-C(3')-C(7')-C(11')    | 124.3(8)   |
| C(6')-C(7')-C(8')-O(8')     | 85.0(9)    |
| C(11')-C(7')-C(8')-O(8')    | -36.8(10)  |
| C(3')-C(7')-C(8')-O(8')     | -160.1(7)  |
| C(6')-C(7')-C(8')-C(9')     | -27.4(9)   |
| C(11')-C(7')-C(8')-C(9')    | -149.2(8)  |
| C(3')-C(7')-C(8')-C(9')     | 87.5(9)    |
| C(6')-O(6')-C(9')-O(9')     | -179.9(8)  |
| C(6')-O(6')-C(9')-C(8')     | 0.1(10)    |
| O(8')-C(8')-C(9')-O(9')     | 84.9(13)   |
| C(7')-C(8')-C(9')-O(9')     | -162.2(10) |
| O(8')-C(8')-C(9')-O(6')     | -95.0(9)   |
| C(7')-C(8')-C(9')-O(6')     | 17.9(10)   |
| C(11')-O(11')-C(10')-O(10') | 172.4(8)   |
| C(11')-O(11')-C(10')-C(3')  | -11.7(10)  |
| C(2')-C(3')-C(10')-O(10')   | -55.7(12)  |
| C(7')-C(3')-C(10')-O(10')   | 175.6(9)   |
| C(4')-C(3')-C(10')-O(10')   | 63.5(12)   |

|                            |            |
|----------------------------|------------|
| C(2')-C(3')-C(10')-O(11')  | 128.7(8)   |
| C(7')-C(3')-C(10')-O(11')  | 0.0(10)    |
| C(4')-C(3')-C(10')-O(11')  | -112.1(8)  |
| C(10')-O(11')-C(11')-C(7') | 18.3(9)    |
| C(8')-C(7')-C(11')-O(11')  | -147.4(8)  |
| C(6')-C(7')-C(11')-O(11')  | 94.9(9)    |
| C(3')-C(7')-C(11')-O(11')  | -17.3(9)   |
| C(9')-O(6')-C(6')-C(5')    | -132.1(8)  |
| C(9')-O(6')-C(6')-C(7')    | -17.7(10)  |
| C(8')-C(7')-C(6')-O(6')    | 27.9(9)    |
| C(11')-C(7')-C(6')-O(6')   | 152.0(8)   |
| C(3')-C(7')-C(6')-O(6')    | -96.0(8)   |
| C(8')-C(7')-C(6')-C(5')    | 142.0(8)   |
| C(11')-C(7')-C(6')-C(5')   | -93.9(9)   |
| C(3')-C(7')-C(6')-C(5')    | 18.1(10)   |
| O(6')-C(6')-C(5')-C(4')    | 75.1(8)    |
| C(7')-C(6')-C(5')-C(4')    | -36.4(9)   |
| C(6')-C(5')-C(4')-C(3')    | 39.7(9)    |
| C(10')-C(3')-C(4')-C(5')   | 81.3(9)    |
| C(2')-C(3')-C(4')-C(5')    | -159.4(8)  |
| C(7')-C(3')-C(4')-C(5')    | -29.6(10)  |
| C(3)-C(2)-C(1)-O(1)        | -179.6(11) |
| C(1')-C(2)-C(1)-O(1)       | -1.8(17)   |
| C(3)-C(2)-C(1)-C(6)        | -1.5(17)   |
| C(1')-C(2)-C(1)-C(6)       | 176.3(11)  |
| C(4)-C(5)-C(6)-C(1)        | -1(2)      |
| O(1)-C(1)-C(6)-C(5)        | 179.9(12)  |
| C(2)-C(1)-C(6)-C(5)        | 1.7(19)    |

---

Symmetry transformations used to generate equivalent atoms:

Table 7. Hydrogen bonds for qylz2b [A and deg.].

---

| D-H...A             | d(D-H) | d(H...A) | d(D...A)  | <(DHA) |
|---------------------|--------|----------|-----------|--------|
| O(4)-H(4)...O(9')#1 | 0.84   | 1.94     | 2.780(11) | 175.8  |
| O(1)-H(1)...O(1')   | 0.84   | 1.88     | 2.596(10) | 143.0  |

---

Symmetry transformations used to generate equivalent atoms:

#1 -x+1,y-1/2,-z+1
